# Supplementary material for: Diversity‐Oriented Synthesis of Natural‐Product‐like Libraries Containing a 3‐Methylbenzofuran Moiety for the Discovery of New Chemical Elicitors
Source: PubMed Central journal article supplement — ChemistryOpen. 2016 Dec 9;6(1):102–11. doi: 10.1002/open.201600118 (PMC5288756; doi:10.1002/open.201600118), 2016-12-09
Supplement: OPEN-6-102-s001.pdf [file OPEN-6-102-s001.pdf]

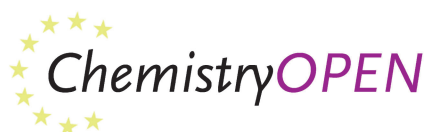

## Supporting Information

© 2017 The Authors. Published by Wiley-VCH Verlag GmbH & Co. KGaA, Weinheim

### **Diversity-Oriented Synthesis of Natural-Product-like Libraries Containing a 3-Methylbenzofuran Moiety for the Discovery of New Chemical Elicitors**

Xingrui He<sup>+, [a]</sup> Xia Chen<sup>+, [b]</sup> Songbo Lin,<sup>[a]</sup> Xiaochang Mo,<sup>[b]</sup> Pengyong Zhou,<sup>[b]</sup> Zhihao Zhang,<sup>[a]</sup> Yaoyao Lu,<sup>[c]</sup> Yu Yang,<sup>[c]</sup> Haining Gu,<sup>[a]</sup> Zhicai Shang,<sup>\*, [a]</sup> Yonggen Lou,<sup>\*, [b]</sup> and Jun Wu<sup>\*, [a]</sup>

open\_201600118\_sm\_miscellaneous\_information.pdf

## Table of Contents

|                                                                                                                                                |         |
|------------------------------------------------------------------------------------------------------------------------------------------------|---------|
| 1. General Information .....                                                                                                                   | S2      |
| 2. Procedures and products .....                                                                                                               | S2-S33  |
| 3. Determination of the configuration of <b>11s</b> , <b>12c</b> , <b>14h</b> and <b>16a</b> .....                                             | S34-S37 |
| 4. Relative induction of GUS activity in rice by compounds ( <b>Supplementary Table 2</b> ) .....                                              | S38-S49 |
| 5. Survival rate of the brown planthopper ( <b>Supplementary Figure 1 and Supplementary Figure 2</b> ) .....                                   | S50-S51 |
| 6. Physicochemical properties used in PCA ( <b>Supplementary Table 3</b> ) .....                                                               | S52     |
| 7. Standard deviation and contribution of each PC to variance ( <b>Supplementary Table 4</b> ).....                                            | S52     |
| 8. Component loadings for PCA of library with established reference sets ( <b>Supplementary Table 5</b> ) .....                                | S53     |
| 9. SMILES codes of 40 top-selling brand name drugs and 20 coumarin and flavonoid natural products ( <b>Supplementary Table 6 and 7</b> ) ..... | S54-S55 |

**1. General Information:** Unless otherwise noted, all commercial materials were used without further purification. Solvents obtained from Aladdin were used directly without further purification, and solvents obtained from other corporations were used after purification directed by *Purification of Laboratory Chemicals, 6th Ed.* Nuclear magnetic resonance (NMR) spectra were recorded with Bruker AVANCE 400MHz. <sup>1</sup>H and <sup>13</sup>C chemical shifts are reported in ppm downfield of tetramethylsilane and referenced to residual solvent peak (CHCl<sub>3</sub> = 7.26 (<sup>1</sup>H NMR), DMSO = 2.50 (<sup>1</sup>H NMR), CDCl<sub>3</sub> = 77.16 (<sup>13</sup>C NMR) unless otherwise noted. Multiplicities are reported using the following abbreviations: s = singlet, d = doublet, t = triplet, q = quartet, m = multiplet, br = broad resonance. High resolution mass spectra for new compounds were recorded at mass spectrometry facilities, Zhejiang University. X-ray diffractions were recorded at x-ray facilities, Zhejiang University. HRMS were obtained using ESI ionization.

## 2. General procedure

### *General procedure for the synthesis of compound 3*

1, 3-cyclohexanedone (20 g, 0.178 mol) was added to a solution of KOH (10 g, 0.178 mol) in water (240 mL). After 5 min, ethyl 2-chloroacetoacetate (29.35 g, 0.178 mol) in MeOH (60 mL) was added. The mixture was stirred at room temperature for 5 days. After being acidified by 4 N HCl (300 mL), the solution was extracted by ethyl acetate (3 × 250 mL). The combined extracts were washed with brine (300 mL) and dried (Na<sub>2</sub>SO<sub>4</sub>), and the solvent was evaporated under vacuum to give the furan ester **1** (25.7 g, 65%). Without further purification, compound **1** (20 g, 0.09 mol) was dissolved in methanol (84 mL) and water (32 mL) and treated with KOH (35.4 g, 0.56 mol). After stirring overnight at room temperature, the reaction mixture was diluted with water (160 mL), acidified with 6 N HCl, and extracted with ethyl acetate (3 × 250 mL). The extract was washed with brine (250 mL), dried (Na<sub>2</sub>SO<sub>4</sub>), and the solvent was evaporated under vacuum to give the furan acid **2** (15.73 g, 90%). Without further purification, the furan acid **2** (10 g, 0.052 mol) in diethylene glycol (80 mL) was treated with Cu powder (3.27 g, 0.052 mol) and dry pyridine (8.23 g, 0.104 mol) and heated at 170-175 °C for 10 h. The mixture was cooled to room temperature, diluted with ice water (150 mL), acidified (4 N HCl, 100 mL), and extracted with ether (3 × 100 mL). The combined ether extracts were washed with water (100 mL) and saturated aqueous NaHCO<sub>3</sub> solution (150 mL), dried (Na<sub>2</sub>SO<sub>4</sub>), and evaporated to give pale yellow crystals **3** (6.6 g, 85%).

### **Ethyl 3-methyl-4-oxo-4,5,6,7-tetrahydrobenzofuran-2-carboxylate (1)**

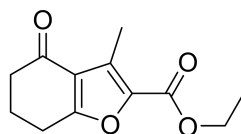

White solid. Yield: 65%. <sup>1</sup>H NMR (400 MHz, Chloroform-*d*) δ 4.38 (q, *J* = 7.1 Hz, 2H), 2.94 (t, *J* = 6.3 Hz, 2H), 2.60 – 2.46 (m, 5H), 2.20 (p, *J* = 6.4 Hz, 2H), 1.40 (t, *J* = 7.1 Hz, 3H).

### 3-methyl-4-oxo-4,5,6,7-tetrahydrobenzofuran-2-carboxylic acid (2)

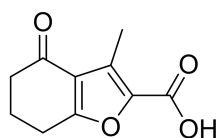

White solid. Yield: 90%.  $^1\text{H}$  NMR (400 MHz, DMSO- $d_6$ )  $\delta$  2.91 (t,  $J$  = 6.2 Hz, 2H), 2.44 (m, 5H), 2.08 (p,  $J$  = 6.4 Hz, 2H).

### 3-methyl-6,7-dihydrobenzofuran-4(5H)-one (3)

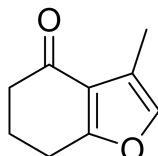

Yellowish solid. Yield: 85%.  $^1\text{H}$  NMR (400 MHz, Chloroform- $d$ )  $\delta$  7.11 – 6.98 (m, 1H), 2.83 (t,  $J$  = 6.3 Hz, 2H), 2.47 (dd,  $J$  = 7.2, 5.8 Hz, 2H), 2.26 – 2.06 (m, 5H).  $^{13}\text{C}$  NMR (101 MHz, Chloroform- $d$ )  $\delta$  195.70, 167.40, 138.90, 120.41, 119.07, 38.29, 23.63, 22.75, 9.07.

#### **General procedure for the synthesis of compounds 7, 8, 9**

To a solution of **3** (2.1g, 14 mmol) in dry toluene (150 mL) was added NaH (2.47g, 61.7 mmol, 60%) at 0 °C, and the mixture was stirred for 30 min. Into the reaction mixture was added a solution of ethyl formate (3.42 g, 46.2 mmol) in dry toluene (20 mL) over a period of 30 min at 0 °C. The mixture was stirred at 0 °C for 1 h and allowed to warm to room temperature and stirred at room temperature for 8 h. Water (100 mL) was added to the mixture at 0 °C and acidified by 2 N HCl. The organic layer was separated, the aqueous layer was extracted with ether, and the combined organic extracts were washed with brine and dried over anhydrous  $\text{Na}_2\text{SO}_4$ . Evaporation of the solvent gave a crude product **4**. Without further purification, the product **4** (2.0 g) in dry toluene (20 mL) was treated with 2,3-Dichloro-5,6-dicyano-1,4- benzoquinone (DDQ) (3.06 g, 13.5 mmol), and the mixture was heated under reflux for 6 h. The reaction mixture was allowed to cool to room temperature and filtered. The solids were washed with toluene and the filtrate was evaporated in vacuo. The residue, purified by column chromatography, gave the corresponding product **7** (1.48 g, 75%, 2 steps).

To a stirred solution of sodium hydride (2.8 g, 70 mmol, 60% dispersion in mineral oil) in dry DME (100 mL) under  $\text{N}_2$  was added a solution of **3** (2.1g, 14 mmol) in dry DME (20 mL) at 0 °C, and the mixture was stirred at 0 °C for 30 min. Into the reaction mixture was added a solution of ethyl acetate (3.69 g, 42 mmol) in dry DME (20 mL) over a period of 30 min at 0 °C. The mixture was heated slowly to reflux over 30 min and heated at reflux for 3 h. After the mixture had cooled, water (40 mL) and saturated  $\text{NH}_4\text{Cl}$  solution (120 mL) were added dropwise, and the aqueous layer was extracted with ethyl acetate (3  $\times$  80 mL). The combined organic layers were washed with brine and dried over  $\text{Na}_2\text{SO}_4$ , and evaporation of the solvent gave the crude product **5**. Without further purification, the product **5** in dry toluene (60 mL) was treated with DDQ (3.06 g, 13.5 mmol) and the mixture was heated under reflux for 6 h. The reaction mixture was allowed to cool to room temperature and filtered. The solids were washed with toluene and the filtrate was evaporated in vacuo. Purification by column chromatography gave the corresponding product **8** (1.87 g, 70%, 2 steps).

The target compound **9** was prepared by following the same procedure as for **8**. Reaction of tetrahydrobenzofuran **3** (2.1g, 14 mmol) with dimethyl carbonate (6.3 g, 70 mmol) in DME (150 mL) afforded **6** as white solid. The product **6** (2.0 g) was treated with DDQ in dry toluene (60 mL) to give compound **9** (2.16 g, 75%, 2 steps).

#### 4-hydroxy-3-methylbenzofuran-5-carbaldehyde (**7**)

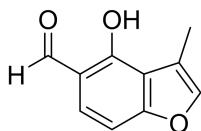

Yellowish solid. Yield: 75%. m.p. 55.1-56.2 °C; <sup>1</sup>H NMR (400 MHz, Chloroform-*d*) δ 11.97 (s, 1H), 9.87 (s, 1H), 7.37 (d, *J* = 8.6 Hz, 1H), 7.31 (q, *J* = 1.4 Hz, 1H), 7.04 (d, *J* = 8.6 Hz, 1H), 2.41 (d, *J* = 1.4 Hz, 3H). <sup>13</sup>C NMR (101 MHz, Chloroform-*d*) δ 195.98, 161.03, 159.49, 141.21, 129.73, 117.71, 117.00, 115.28, 104.85, 9.46. HRMS (EI) *m/z*: 176.0471 (M<sup>+</sup>); calc. for C<sub>10</sub>H<sub>8</sub>O<sub>3</sub>: 176.0473.

#### 1-(4-hydroxy-3-methylbenzofuran-5-yl)ethan-1-one (**8**)

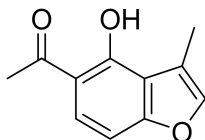

Yellowish solid. Yield: 70%. m.p. 61.7-62.4 °C; <sup>1</sup>H NMR (400 MHz, Chloroform-*d*) δ 13.28 (s, 1H), 7.58 (d, *J* = 8.8 Hz, 1H), 7.28 (q, *J* = 1.4 Hz, 1H), 6.93 (d, *J* = 8.9 Hz, 1H), 2.63 (s, 3H), 2.41 (d, *J* = 1.4 Hz, 3H). <sup>13</sup>C NMR (101 MHz, Chloroform-*d*) δ 204.10, 160.50, 160.42, 140.79, 126.97, 117.87, 117.26, 114.05, 103.71, 26.93, 9.57. HRMS (EI) *m/z*: 190.0630 (M<sup>+</sup>); calc. for C<sub>11</sub>H<sub>10</sub>O<sub>3</sub>: 190.0630.

#### methyl 4-hydroxy-3-methylbenzofuran-5-carboxylate (**9**)

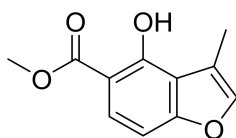

White solid. Yield: 75%. m.p. 71.1-72.1 °C; <sup>1</sup>H NMR (400 MHz, Chloroform-*d*) δ 11.43 (s, 1H), 7.71 (d, *J* = 8.8 Hz, 1H), 7.28 (q, *J* = 1.4 Hz, 1H), 6.93 (d, *J* = 8.8 Hz, 1H), 3.95 (s, 3H), 2.41 (d, *J* = 1.4 Hz, 3H). <sup>13</sup>C NMR (101 MHz, Chloroform-*d*) δ 171.28, 160.21, 159.02, 140.65, 125.86, 117.59, 116.87, 105.68, 103.85, 52.10, 9.59. HRMS (EI) *m/z*: 206.0576 (M<sup>+</sup>); calc. for C<sub>11</sub>H<sub>10</sub>O<sub>4</sub>: 206.0579.

#### *General procedure for the synthesis of angular 3-methylfuranocoumarins*

A solution of **7** (200 mg, 1.12 mmol), ethyl acetoacetate (146 mg, 1.12 mmol) and 2d piperidine in dry EtOH (10 mL) was heated at reflux for 4 h. The product precipitated quantitatively from the solution as it was formed. The precipitate was filtered and washed with ethanol to afford pure **10a** as a white solid in 90% yield.

Target compounds **10b-10h** were prepared by following the same procedure as for **10a**.

**3-acetyl-9-methyl-2H-furo[2,3-*h*]chromen-2-one (10a)**

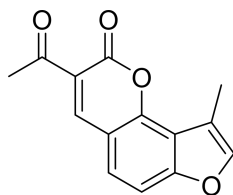

Yellow solid. Yield: 90%. m.p. 185.0-185.7 °C. <sup>1</sup>H NMR (400 MHz, Chloroform-*d*) δ 8.55 (s, 1H), 7.47 – 7.36 (m, 2H), 7.33 (d, *J* = 8.6 Hz, 1H), 2.67 (s, 3H), 2.46 (d, *J* = 1.3 Hz, 3H).

<sup>13</sup>C NMR (101 MHz, Chloroform-*d*) δ 194.55, 158.46, 158.24, 150.55, 147.86, 141.68, 124.99, 120.29, 116.14, 115.13, 111.87, 108.82, 29.59, 8.47. HRMS (EI) *m/z*: 242.0581 (M<sup>+</sup>); calc. for C<sub>14</sub>H<sub>10</sub>O<sub>4</sub>: 242.0579.

**ethyl 9-methyl-2-oxo-2H-furo[2,3-*h*]chromene-3-carboxylate (10b)**

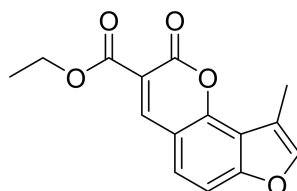

White solid. Yield: 92%. m.p. 129.2-129.7 °C. <sup>1</sup>H NMR (400 MHz, Chloroform-*d*) δ 8.63 (s, 1H), 7.51 – 7.33 (m, 3H), 4.42 (q, *J* = 7.1 Hz, 2H), 2.51 (d, *J* = 1.4 Hz, 3H), 1.43 (t, *J* = 7.1 Hz, 3H).

<sup>13</sup>C NMR (101 MHz, Chloroform-*d*) δ 163.37, 159.37, 156.53, 151.35, 149.89, 142.64, 125.27, 117.18, 116.16, 114.93, 112.43, 109.58, 61.76, 14.27, 9.51. HRMS (EI) *m/z*: 272.0686 (M<sup>+</sup>); calc. for C<sub>15</sub>H<sub>12</sub>O<sub>5</sub>: 272.0685.

**9-methyl-3-propionyl-2H-furo[2,3-*h*]chromen-2-one (10c)**

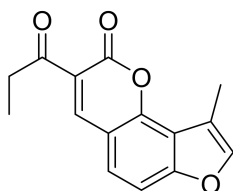

Yellowish solid. Yield: 82%. m.p. 165.8-166.4 °C. <sup>1</sup>H NMR (400 MHz, Chloroform-*d*) δ 8.64 (s, 1H), 7.52 – 7.45 (m, 2H), 7.41 (d, *J* = 8.6 Hz, 1H), 3.19 (q, *J* = 7.2 Hz, 2H), 2.54 (d, *J* = 1.4 Hz, 3H), 1.20 (t, *J* = 7.2 Hz, 3H).

<sup>13</sup>C NMR (101 MHz, Chloroform-*d*) δ 198.63, 159.40, 159.14, 151.45, 148.82, 142.66, 125.94, 121.30, 117.15, 116.15, 112.97, 109.79, 36.00, 9.53, 8.00. HRMS (EI) *m/z*: 256.0736 (M<sup>+</sup>); calc. for C<sub>15</sub>H<sub>12</sub>O<sub>4</sub>: 256.0736.

**3-isobutyryl-9-methyl-2H-furo[2,3-*h*]chromen-2-one (10d)**

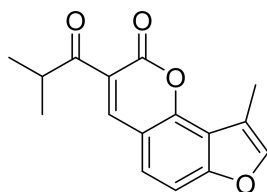

Yellowish solid. Yield: 84%. m.p. 152.7-154.0 °C. <sup>1</sup>H NMR (400 MHz, Chloroform-*d*) δ 8.59 (s, 1H), 7.52 – 7.44 (m, 2H), 7.40 (d, *J* = 8.6 Hz, 1H), 3.90 (hept, *J* = 6.8 Hz, 1H), 2.54 (d, *J* = 1.4 Hz, 3H), 1.21 (d, *J* = 6.8 Hz, 6H). <sup>13</sup>C NMR (101 MHz, Chloroform-*d*) δ 202.41, 159.33, 158.82, 151.40, 149.21, 142.66, 125.77, 121.37, 117.14, 116.13, 113.06, 109.73, 38.42, 18.33, 9.50. HRMS (EI) *m/z*: 270.0895 (M<sup>+</sup>); calc. for C<sub>16</sub>H<sub>14</sub>O<sub>4</sub>: 270.0892.

**3-butyl-9-methyl-2*H*-furo[2,3-*h*]chromen-2-one (10e)**

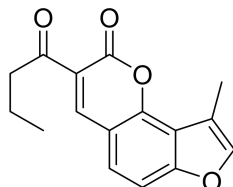

Yellowish solid. Yield: 86%. m.p. 157.7-159.3 °C. <sup>1</sup>H NMR (400 MHz, Chloroform-*d*) δ 8.62 (s, 1H), 7.52 – 7.44 (m, 2H), 7.41 (d, *J* = 8.5 Hz, 1H), 3.13 (t, *J* = 7.2 Hz, 2H), 2.54 (d, *J* = 1.4 Hz, 3H), 1.74 (h, *J* = 7.4 Hz, 2H), 1.01 (t, *J* = 7.4 Hz, 3H). <sup>13</sup>C NMR (101 MHz, Chloroform-*d*) δ 198.14, 159.39, 159.11, 151.46, 148.80, 142.66, 125.92, 121.53, 117.16, 116.16, 112.99, 109.78, 44.40, 17.44, 13.81, 9.52. HRMS (EI) *m/z*: 270.0891 (M<sup>+</sup>); calc. for C<sub>16</sub>H<sub>14</sub>O<sub>4</sub>: 270.0892.

**3-benzoyl-9-methyl-2*H*-furo[2,3-*h*]chromen-2-one (10f)**

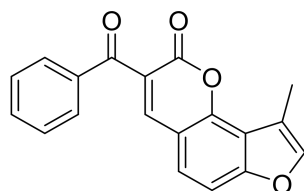

Yellowish solid. Yield: 85%. m.p. 215.5-216.2 °C. <sup>1</sup>H NMR (400 MHz, DMSO-*d*<sub>6</sub>) δ 8.55 (s, 1H), 8.03 – 7.87 (m, 3H), 7.81 – 7.65 (m, 2H), 7.67 – 7.50 (m, 3H), 2.45 (d, *J* = 1.3 Hz, 3H). <sup>13</sup>C NMR (101 MHz, DMSO-*d*<sub>6</sub>) δ 191.78, 158.10, 157.80, 149.96, 147.11, 143.50, 136.32, 133.63, 129.46, 128.62, 125.84, 123.31, 116.28, 114.93, 112.91, 109.24, 9.15. HRMS (EI) *m/z*: 304.0737 (M<sup>+</sup>); calc. for C<sub>19</sub>H<sub>12</sub>O<sub>4</sub>: 304.0736.

**3-(3,4-dimethoxybenzoyl)-9-methyl-2*H*-furo[2,3-*h*]chromen-2-one (10g)**

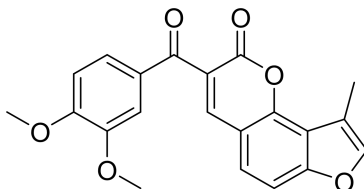

White solid. Yield: 83%. m.p. 238.2-239.5 °C. <sup>1</sup>H NMR (400 MHz, Chloroform-*d*) δ 8.15 (s, 1H), 7.57 (d, *J* = 2.0 Hz, 1H), 7.51 – 7.38 (m, 4H), 6.89 (d, *J* = 8.4 Hz, 1H), 3.96 (d, *J* = 1.6 Hz, 6H), 2.58 – 2.53 (m, 3H). <sup>13</sup>C NMR (101 MHz, Chloroform-*d*) δ 190.43, 158.86, 158.49, 153.98, 150.68, 149.22, 146.26, 142.66, 129.40, 125.41, 124.83, 124.32, 117.43, 116.10, 112.78, 111.14, 109.90, 109.57, 56.15, 56.09, 9.58. HRMS (EI) *m/z*: 364.0951 (M<sup>+</sup>); calc. for C<sub>21</sub>H<sub>16</sub>O<sub>6</sub>: 364.0947.

### 3-isonicotinoyl-9-methyl-2H-furo[2,3-*h*]chromen-2-one (10h)

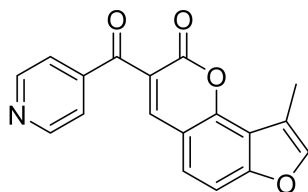

Yellow solid. Yield: 87%. m.p. 250.2-252.1 °C. <sup>1</sup>H NMR (400 MHz, Chloroform-*d*) δ 8.85 – 8.79 (m, 2H), 8.44 (s, 1H), 7.69 – 7.62 (m, 2H), 7.55 – 7.43 (m, 3H), 2.55 (d, *J* = 1.4 Hz, 3H). <sup>13</sup>C NMR (101 MHz, Chloroform-*d*) δ 191.35, 159.61, 158.28, 151.54, 150.24, 149.62, 143.75, 142.97, 125.58, 122.09, 121.79, 117.55, 116.20, 112.74, 110.11, 9.51. HRMS (EI) *m/z*: 305.0693 (M<sup>+</sup>); calc. for C<sub>18</sub>H<sub>11</sub>NO<sub>4</sub>: 305.0688.

### General procedure for the synthesis of angular 3-methylfuranochalcones

NaH (2 mmol, 60% dispersion in mineral oil) was added in portions to a solution of **8** (1 mmol) in dry THF (5 mL), under N<sub>2</sub> and with vigorous stirring. After being stirred for 15 min, a solution of the corresponding benzaldehyde (1 mmol) in dry THF (3 mL) was added dropwise over 5 min, and the reaction mixture was stirred at room temperature for 2 h. Water (10 mL) was added to quench the reaction. The pH of the mixture was adjusted at 1 by adding 2 N HCl. The product was precipitated as a colorful solid in aqueous solution. After filtration, the crude product was recrystallized from EtOH to afford the pure product as a colorful solid.

Using this procedure, target compounds **11b-11ab** were obtained. An additional amount of product can be obtained from the mother liquors. To this end, the solvent was evaporated in vacuo and the residue was purified by column chromatography.

### (*E*)-1-(4-hydroxy-3-methylbenzofuran-5-yl)-3-phenylprop-2-en-1-one (11a)

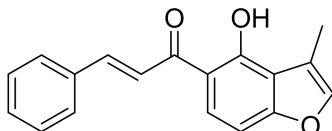

Yellow solid. Yield: 82%. m.p. 192.0-193.0 °C. <sup>1</sup>H NMR (400 MHz, Chloroform-*d*) δ 13.97 (s, 1H), 7.91 (d, *J* = 15.5 Hz, 1H), 7.78 (dd, *J* = 9.1, 1.5 Hz, 1H), 7.70 – 7.60 (m, 3H), 7.46 – 7.39 (m, 3H), 7.29 (t, *J* = 1.4 Hz, 1H), 6.99 (dd, *J* = 8.9, 1.1 Hz, 1H), 2.44 (d, *J* = 1.3 Hz, 3H). <sup>13</sup>C NMR (101 MHz, Chloroform-*d*) δ 192.29, 160.95, 159.46, 143.53, 139.76, 133.73, 129.66, 127.96, 127.53, 124.95, 119.71, 117.08, 116.28, 113.18, 102.72, 8.60. HRMS (EI) *m/z*: 278.0949 (M<sup>+</sup>); calc. for C<sub>18</sub>H<sub>14</sub>O<sub>3</sub>: 278.0943.

### (*E*)-1-(4-hydroxy-3-methylbenzofuran-5-yl)-3-(*p*-tolyl)prop-2-en-1-one (11b)

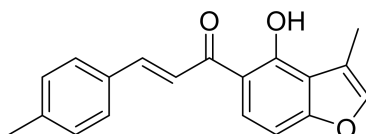

Orange solid. Yield: 85%. m.p. 115.8-116.9 °C. <sup>1</sup>H NMR (400 MHz, Chloroform-*d*) δ 14.03 (s, 1H), 7.91 (d, *J* = 15.4 Hz, 1H), 7.80 (d, *J* = 8.9 Hz, 1H), 7.64 (d, *J* = 15.5 Hz, 1H), 7.60 – 7.54 (m, 2H), 7.30 (q, *J* = 1.4 Hz, 1H), 7.23 (s, 1H), 6.99 (d, *J* = 8.9 Hz, 1H), 2.44 (d, *J* = 1.4 Hz, 3H), 2.41



(s, 3H).  $^{13}\text{C}$  NMR (101 MHz, Chloroform-*d*)  $\delta$  193.44, 161.97, 160.46, 144.70, 141.34, 140.77, 132.06, 129.77, 128.63, 125.99, 119.69, 118.12, 117.33, 114.27, 103.69, 21.59, 9.65. HRMS (EI)  $m/z$ : 292.1098 ( $\text{M}^+$ ); calc. for  $\text{C}_{19}\text{H}_{16}\text{O}_3$ : 292.1099.

**(*E*)-1-(4-hydroxy-3-methylbenzofuran-5-yl)-3-(4-isopropylphenyl)prop-2-en-1-one (11c)**

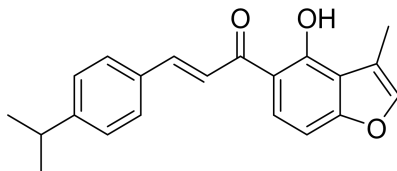

Brown solid. Yield: 87%. m.p. 97.1-98.8 °C.  $^1\text{H}$  NMR (400 MHz, Chloroform-*d*)  $\delta$  14.04 (s, 1H), 7.89 (d,  $J = 15.4$  Hz, 1H), 7.77 (d,  $J = 8.9$  Hz, 1H), 7.66 – 7.52 (m, 3H), 7.31 – 7.25 (m, 3H), 6.97 (d,  $J = 8.9$  Hz, 1H), 2.94 (hept,  $J = 6.9$  Hz, 1H), 2.42 (d,  $J = 1.4$  Hz, 3H), 1.27 (d,  $J = 6.9$  Hz, 6H).  $^{13}\text{C}$  NMR (101 MHz, Chloroform-*d*)  $\delta$  193.40, 161.97, 160.45, 152.18, 144.69, 140.75, 132.44, 128.76, 127.14, 125.98, 119.73, 118.10, 117.32, 114.28, 103.68, 34.18, 23.79, 9.65. HRMS (EI)  $m/z$ : 320.1415 ( $\text{M}^+$ ); calc. for  $\text{C}_{21}\text{H}_{20}\text{O}_3$ : 320.1412.

**(*E*)-3-(4-(tert-butyl)phenyl)-1-(4-hydroxy-3-methylbenzofuran-5-yl)prop-2-en-1-one (11d)**

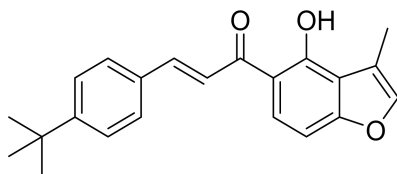

Yellow solid. Yield: 84%. m.p. 128.1-129.1 °C.  $^1\text{H}$  NMR (500 MHz, Chloroform-*d*)  $\delta$  14.03 (s, 1H), 7.91 (d,  $J = 15.4$  Hz, 1H), 7.79 (d,  $J = 9.0$  Hz, 1H), 7.70 – 7.55 (m, 3H), 7.49 – 7.42 (m, 2H), 7.29 (t,  $J = 1.6$  Hz, 1H), 6.99 (d,  $J = 8.9$  Hz, 1H), 2.44 (d,  $J = 1.5$  Hz, 3H), 1.35 (s, 9H).  $^{13}\text{C}$  NMR (126 MHz, Chloroform-*d*)  $\delta$  193.12, 161.98, 160.47, 153.50, 144.75, 140.81, 140.60, 130.25, 125.94, 119.89, 118.14, 117.33, 114.21, 105.80, 103.70, 61.04, 56.25, 9.63. HRMS (EI)  $m/z$ : 334.1567 ( $\text{M}^+$ ); calc. for  $\text{C}_{22}\text{H}_{22}\text{O}_3$ : 334.1569.

**(*E*)-1-(4-hydroxy-3-methylbenzofuran-5-yl)-3-(4-methoxyphenyl)prop-2-en-1-one (11e)**

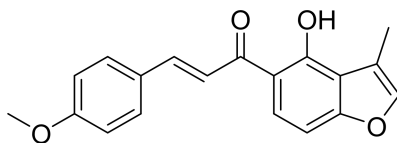

Yellow solid. Yield: 88%. m.p. 148.4-149.9 °C.  $^1\text{H}$  NMR (400 MHz, Chloroform-*d*)  $\delta$  14.10 (s, 1H), 7.90 (d,  $J = 15.3$  Hz, 1H), 7.79 (d,  $J = 8.9$  Hz, 1H), 7.67 – 7.60 (m, 2H), 7.55 (d,  $J = 15.4$  Hz, 1H), 7.30 (q,  $J = 1.4$  Hz, 1H), 7.03 – 6.89 (m, 3H), 3.87 (s, 3H), 2.44 (d,  $J = 1.4$  Hz, 3H).  $^{13}\text{C}$  NMR (101 MHz, Chloroform-*d*)  $\delta$  193.32, 161.91, 161.82, 160.38, 144.44, 140.72, 130.42, 127.51, 125.91, 118.21, 118.09, 117.31, 114.46, 114.27, 103.61, 55.44, 9.65. HRMS (EI)  $m/z$ : 308.1051 ( $\text{M}^+$ ); calc. for  $\text{C}_{19}\text{H}_{16}\text{O}_4$ : 308.1049.

**(*E*)-3-(4-ethoxyphenyl)-1-(4-hydroxy-3-methylbenzofuran-5-yl)prop-2-en-1-one (11f)**

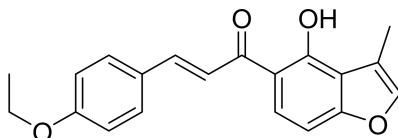

Yellow solid. Yield: 85%. m.p. 148.6-149.3 °C. <sup>1</sup>H NMR (400 MHz, Chloroform-*d*) δ 14.11 (s, 1H), 7.93 – 7.74 (m, 2H), 7.66 – 7.50 (m, 3H), 7.29 (t, *J* = 1.5 Hz, 1H), 7.01 – 6.89 (m, 3H), 4.09 (q, *J* = 7.0 Hz, 2H), 2.44 (d, *J* = 1.4 Hz, 3H), 1.44 (d, *J* = 7.0 Hz, 3H). <sup>13</sup>C NMR (101 MHz, Chloroform-*d*) δ 193.35, 161.91, 161.27, 160.38, 144.54, 140.71, 130.44, 127.33, 125.91, 118.09, 117.32, 114.93, 114.29, 103.60, 63.70, 14.74, 9.65. HRMS (EI) *m/z*: 322.1202 (M<sup>+</sup>); calc. for C<sub>20</sub>H<sub>18</sub>O<sub>4</sub>: 322.1205.

**(*E*)-3-(4-fluorophenyl)-1-(4-hydroxy-3-methylbenzofuran-5-yl)prop-2-en-1-one (11g)**

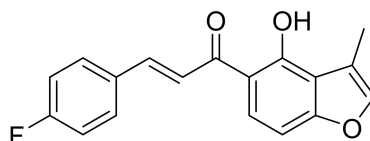

Yellow solid. Yield: 74%. m.p. 162.9-163.3 °C. <sup>1</sup>H NMR (400 MHz, Chloroform-*d*) δ 13.97 (s, 1H), 7.90 (d, *J* = 15.4 Hz, 1H), 7.80 (d, *J* = 8.9 Hz, 1H), 7.74 – 7.57 (m, 3H), 7.33 (q, *J* = 1.4 Hz, 1H), 7.22 – 7.10 (m, 2H), 7.02 (d, *J* = 8.9 Hz, 1H), 2.47 (d, *J* = 1.4 Hz, 3H). <sup>13</sup>C NMR (101 MHz, Chloroform-*d*) δ 193.12, 162.01, 160.53, 143.24, 140.84, 131.05 (d, *J* = 3.3 Hz), 130.48 (d, *J* = 8.7 Hz), 125.93, 120.48 (d, *J* = 2.5 Hz), 118.15, 117.33, 116.31, 116.09, 114.17, 103.81, 9.63. HRMS (EI) *m/z*: 296.0847 (M<sup>+</sup>); calc. for C<sub>18</sub>H<sub>13</sub>FO<sub>3</sub>: 296.0849.

**(*E*)-3-(4-chlorophenyl)-1-(4-hydroxy-3-methylbenzofuran-5-yl)prop-2-en-1-one (11h)**

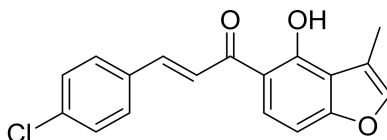

Yellow solid. Yield: 81%. m.p. 160.6-161.7 °C. <sup>1</sup>H NMR (400 MHz, Chloroform-*d*) δ 13.93 (d, *J* = 2.7 Hz, 1H), 7.96 – 7.74 (m, 2H), 7.73 – 7.55 (m, 3H), 7.53 – 7.37 (m, 2H), 7.32 (s, 1H), 7.01 (dd, *J* = 9.0, 3.1 Hz, 1H), 2.46 (d, *J* = 3.5 Hz, 3H). <sup>13</sup>C NMR (101 MHz, Chloroform-*d*) δ 192.51, 161.54, 160.06, 142.53, 140.37, 136.10, 132.75, 129.18, 128.79, 125.42, 120.71, 117.64, 116.83, 113.66, 103.35, 9.13. HRMS (EI) *m/z*: 312.0553 (M<sup>+</sup>); calc. for C<sub>18</sub>H<sub>13</sub>ClO<sub>3</sub>: 312.0553.

**(*E*)-3-(4-bromophenyl)-1-(4-hydroxy-3-methylbenzofuran-5-yl)prop-2-en-1-one (11i)**

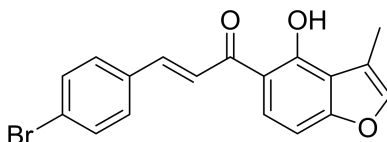

Yellow solid. Yield: 76%. m.p. 168.2-169.4 °C. <sup>1</sup>H NMR (400 MHz, Chloroform-*d*) δ 13.90 (s, 1H), 7.86 – 7.69 (m, 2H), 7.67 – 7.45 (m, 5H), 7.29 (t, *J* = 1.4 Hz, 1H), 6.98 (d, *J* = 8.9 Hz, 1H), 2.43 (d, *J* = 1.4 Hz, 3H). <sup>13</sup>C NMR (101 MHz, Chloroform-*d*) δ 192.99, 162.05, 160.56, 143.10, 140.87, 133.66, 132.25, 129.88, 125.93, 125.00, 121.28, 118.15, 117.33, 114.15, 103.87, 9.64. HRMS (EI) *m/z*: 356.0047 (M<sup>+</sup>); calc. for C<sub>18</sub>H<sub>13</sub>BrO<sub>3</sub>: 356.0048.

**(E)-3-(4-(dimethylamino)phenyl)-1-(4-hydroxy-3-methylbenzofuran-5-yl)prop-2-en-1-one (11j)**

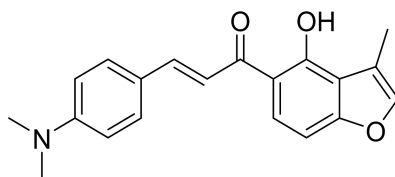

Red solid. Yield: 86%. m.p. 231.1-232.1 °C. <sup>1</sup>H NMR (400 MHz, Chloroform-*d*) δ 14.35 (s, 1H), 7.90 (d, *J* = 15.2 Hz, 1H), 7.79 (d, *J* = 8.9 Hz, 1H), 7.64 – 7.52 (m, 2H), 7.46 (d, *J* = 15.2 Hz, 1H), 7.28 (q, *J* = 1.4 Hz, 1H), 6.97 (d, *J* = 8.9 Hz, 1H), 6.75 – 6.66 (m, 2H), 3.05 (s, 6H), 2.44 (d, *J* = 1.4 Hz, 3H). <sup>13</sup>C NMR (101 MHz, Chloroform-*d*) δ 193.29, 161.80, 160.18, 152.12, 145.61, 140.56, 130.68, 125.82, 122.56, 118.05, 117.30, 114.99, 114.44, 111.84, 103.33, 40.15, 9.69. HRMS (EI) *m/z*: 321.1369 (M<sup>+</sup>); calc. for C<sub>20</sub>H<sub>19</sub>NO<sub>3</sub>: 321.1365.

**(E)-4-(3-(4-hydroxy-3-methylbenzofuran-5-yl)-3-oxoprop-1-en-1-yl)benzonitrile (11k)**

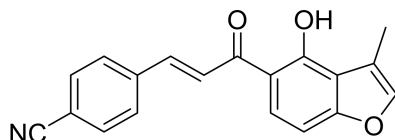

Yellow solid. Yield: 73%. m.p. 210.7-212.4 °C. <sup>1</sup>H NMR (400 MHz, Chloroform-*d*) δ 13.77 (s, 1H), 7.87 (d, *J* = 15.5 Hz, 1H), 7.82 – 7.64 (m, 6H), 7.32 (s, 1H), 7.01 (d, *J* = 8.9 Hz, 1H), 2.44 (s, 3H). <sup>13</sup>C NMR (101 MHz, DMSO-*d*<sub>6</sub>) δ 192.07, 161.07, 160.26, 141.32, 140.55, 138.58, 132.22, 128.29, 125.43, 123.64, 117.87, 117.74, 116.87, 113.62, 113.11, 103.62, 9.10. HRMS (EI) *m/z*: 303.0902 (M<sup>+</sup>); calc. for C<sub>19</sub>H<sub>13</sub>NO<sub>3</sub>: 303.0895.

**(E)-3-(4-(diethylamino)phenyl)-1-(4-hydroxy-3-methylbenzofuran-5-yl)prop-2-en-1-one (11l)**

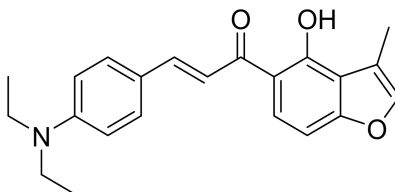

Yellow solid. Yield: 88%. m.p. 140.1-141.1 °C. <sup>1</sup>H NMR (400 MHz, Chloroform-*d*) δ 14.40 (s, 1H), 7.90 (d, *J* = 15.1 Hz, 1H), 7.80 (d, *J* = 8.9 Hz, 1H), 7.55 (d, *J* = 8.5 Hz, 2H), 7.44 (d, *J* = 15.1 Hz, 1H), 7.30 – 7.24 (m, 1H), 6.97 (d, *J* = 8.9 Hz, 1H), 6.66 (d, *J* = 8.4 Hz, 2H), 3.42 (q, *J* = 7.1 Hz, 4H), 2.44 (d, *J* = 1.4 Hz, 3H), 1.21 (t, *J* = 7.1 Hz, 6H). <sup>13</sup>C NMR (101 MHz, Chloroform-*d*) δ 193.27, 161.78, 160.14, 149.88, 145.71, 140.53, 131.05, 125.78, 121.75, 118.05, 117.31, 114.49, 114.32, 111.29, 103.28, 44.56, 12.62, 9.69. HRMS (EI) *m/z*: 349.1679 (M<sup>+</sup>); calc. for C<sub>22</sub>H<sub>23</sub>NO<sub>3</sub>: 349.1678.

**(E)-1-(4-hydroxy-3-methylbenzofuran-5-yl)-3-(4-nitrophenyl)prop-2-en-1-one (11m)**

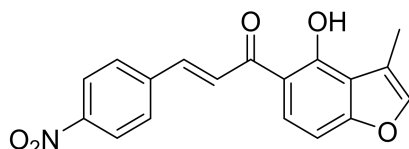

Dark red solid. Yield: 81%. m.p. 238.9-240.7 °C. <sup>1</sup>H NMR (400 MHz, Chloroform-*d*) δ 13.78 (s, 1H), 8.36 – 8.29 (m, 2H), 7.95 (d, *J* = 15.6 Hz, 1H), 7.87 – 7.78 (m, 4H), 7.35 (d, *J* = 1.5 Hz, 1H), 7.06 (d, *J* = 8.9 Hz, 1H), 2.48 (d, *J* = 1.4 Hz, 3H). <sup>13</sup>C NMR (101 MHz, Chloroform-*d*) δ 192.93, 162.06, 160.57, 142.77, 140.85, 134.90, 133.62, 131.45, 127.96, 127.73, 126.04, 123.61, 117.34, 114.14, 103.86, 9.63. HRMS (EI) *m/z*: 323.0798 (M<sup>+</sup>); calc. for C<sub>18</sub>H<sub>13</sub>NO<sub>5</sub>: 323.0794.

**(*E*)-3-(2-fluorophenyl)-1-(4-hydroxy-3-methylbenzofuran-5-yl)prop-2-en-1-one (11n)**

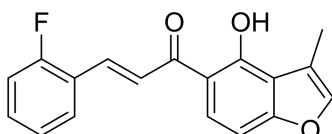

Yellow solid. Yield: 73%. m.p. 124.4-125.4 °C. <sup>1</sup>H NMR (400 MHz, Chloroform-*d*) δ 13.94 (d, *J* = 2.5 Hz, 1H), 7.99 (d, *J* = 15.7 Hz, 1H), 7.90 – 7.72 (m, 2H), 7.66 (t, *J* = 7.7 Hz, 1H), 7.41 (q, *J* = 7.0, 6.5 Hz, 1H), 7.30 (s, 1H), 7.19 (dt, *J* = 27.0, 8.8 Hz, 2H), 7.00 (d, *J* = 8.8 Hz, 1H), 2.45 (s, 3H). <sup>13</sup>C NMR (101 MHz, Chloroform-*d*) δ 192.76, 161.53, 160.04, 140.31, 136.80 (d, *J* = 1.8 Hz), 131.48 (d, *J* = 8.7 Hz), 129.52 (d, *J* = 3.1 Hz), 125.55, 124.04 (d, *J* = 3.7 Hz), 122.89 (d, *J* = 11.4 Hz), 122.45, 122.34, 117.58, 115.96, 115.74, 113.69, 103.33, 9.13. HRMS (EI) *m/z*: 296.0851 (M<sup>+</sup>); calc. for C<sub>18</sub>H<sub>13</sub>FO<sub>3</sub>: 296.0849.

**(*E*)-3-(2-chlorophenyl)-1-(4-hydroxy-3-methylbenzofuran-5-yl)prop-2-en-1-one (11o)**

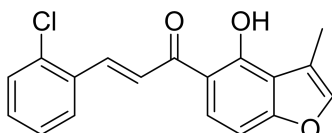

Yellow solid. Yield: 83%. m.p. 145.1-146.1 °C. <sup>1</sup>H NMR (400 MHz, Chloroform-*d*) δ 13.89 (s, 1H), 8.32 (d, *J* = 15.5 Hz, 1H), 7.85 – 7.75 (m, 2H), 7.68 (d, *J* = 15.5 Hz, 1H), 7.52 – 7.44 (m, 1H), 7.41 – 7.31 (m, 3H), 7.02 (d, *J* = 8.9 Hz, 1H), 2.47 (d, *J* = 1.4 Hz, 3H). <sup>13</sup>C NMR (101 MHz, Chloroform-*d*) δ 192.56, 161.58, 160.09, 140.38, 139.80, 135.12, 132.65, 130.82, 129.89, 127.40, 126.61, 125.55, 122.98, 117.67, 116.87, 113.68, 103.38, 9.15. HRMS (EI) *m/z*: 312.0558 (M<sup>+</sup>); calc. for C<sub>18</sub>H<sub>13</sub>ClO<sub>3</sub>: 312.0553.

**(*E*)-3-(2-bromophenyl)-1-(4-hydroxy-3-methylbenzofuran-5-yl)prop-2-en-1-one (11p)**

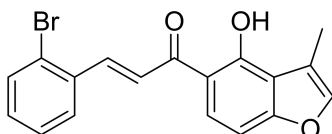

Yellow solid. Yield: 81%. m.p. 151.2-152.3 °C. <sup>1</sup>H NMR (400 MHz, Chloroform-*d*) δ 13.87 (s, 1H), 8.26 (d, *J* = 15.4 Hz, 1H), 7.78 (d, *J* = 8.7 Hz, 2H), 7.71 – 7.55 (m, 2H), 7.45 – 7.27 (m, 3H), 7.01 (d, *J* = 8.9 Hz, 1H), 2.46 (s, 3H). <sup>13</sup>C NMR (101 MHz, Chloroform-*d*) δ 192.93, 162.06, 160.57, 142.77, 140.85, 134.90, 133.62, 131.45, 127.96, 127.73, 126.04, 123.61, 118.13, 117.34,

114.14, 103.86, 9.63. HRMS (EI)  $m/z$ : 356.0050 ( $M^+$ ); calc. for  $C_{18}H_{13}BrO_3$ : 356.0048.

**(E)-1-(4-hydroxy-3-methylbenzofuran-5-yl)-3-(2-methoxyphenyl)prop-2-en-1-one (11q)**

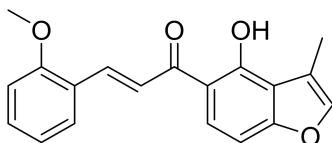

Yellow solid. Yield: 86%. m.p. 145.2-146.2 °C.  $^1H$  NMR (400 MHz, Chloroform-*d*)  $\delta$  14.10 (s, 1H), 8.20 (d,  $J = 15.6$  Hz, 1H), 7.84 – 7.69 (m, 2H), 7.63 (dd,  $J = 7.7, 1.8$  Hz, 1H), 7.37 (ddd,  $J = 8.6, 7.5, 1.7$  Hz, 1H), 7.27 (s, 1H), 6.96 (td,  $J = 13.0, 11.9, 7.9$  Hz, 3H), 3.92 (s, 3H), 2.43 (d,  $J = 1.4$  Hz, 3H).  $^{13}C$  NMR (101 MHz, Chloroform-*d*)  $\delta$  193.89, 161.95, 160.39, 158.92, 140.69, 140.19, 131.97, 129.52, 126.09, 123.77, 121.37, 120.77, 118.05, 117.32, 114.38, 111.25, 103.59, 55.57, 9.66. HRMS (EI)  $m/z$ : 308.1051 ( $M^+$ ); calc. for  $C_{19}H_{16}O_4$ : 308.1049.

**(E)-3-(2,4-dimethylphenyl)-1-(4-hydroxy-3-methylbenzofuran-5-yl)prop-2-en-1-one (11r)**

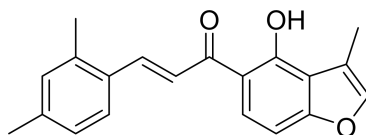

Light brown solid. Yield: 85%. m.p. 155.0-156.3 °C.  $^1H$  NMR (400 MHz, Chloroform-*d*)  $\delta$  14.03 (s, 1H), 8.19 (d,  $J = 15.2$  Hz, 1H), 7.78 (d,  $J = 8.9$  Hz, 1H), 7.63 (d,  $J = 8.0$  Hz, 1H), 7.55 (d,  $J = 15.3$  Hz, 1H), 7.29 (q,  $J = 1.4$  Hz, 1H), 7.07 (d,  $J = 7.2$  Hz, 2H), 6.98 (d,  $J = 8.9$  Hz, 1H), 2.47 (s, 3H), 2.44 (d,  $J = 1.4$  Hz, 3H), 2.35 (s, 3H).  $^{13}C$  NMR (101 MHz, Chloroform-*d*)  $\delta$  193.43, 161.96, 160.42, 142.13, 140.93, 140.73, 138.54, 131.79, 130.92, 127.19, 126.49, 125.99, 120.69, 118.08, 117.31, 114.27, 103.66, 21.40, 19.81, 9.63. HRMS (EI)  $m/z$ : 306.1259 ( $M^+$ ); calc. for  $C_{20}H_{18}O_3$ : 306.1256.

**(E)-1-(4-hydroxy-3-methylbenzofuran-5-yl)-3-mesitylprop-2-en-1-one (11s)**

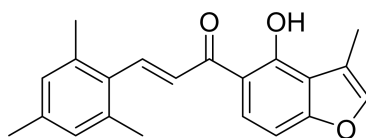

Yellow solid. Yield: 86%. m.p. 141.9-142.7 °C.  $^1H$  NMR (400 MHz, Chloroform-*d*)  $\delta$  13.94 (s, 1H), 8.07 (d,  $J = 15.8$  Hz, 1H), 7.67 (d,  $J = 8.9$  Hz, 1H), 7.34 – 7.26 (m, 2H), 7.01 – 6.88 (m, 3H), 2.45 (d,  $J = 1.4$  Hz, 3H), 2.42 (s, 6H), 2.31 (s, 3H).  $^{13}C$  NMR (101 MHz, Chloroform-*d*)  $\delta$  193.50, 161.99, 160.46, 143.06, 140.79, 138.78, 137.26, 131.46, 129.37, 126.06, 125.99, 118.11, 117.33, 114.23, 103.77, 21.31, 21.12, 9.64. HRMS (EI)  $m/z$ : 320.1416 ( $M^+$ ); calc. for  $C_{21}H_{20}O_3$ : 320.1412.

**(E)-1-(4-hydroxy-3-methylbenzofuran-5-yl)-3-(3,4,5-trimethoxyphenyl)prop-2-en-1-one (11t)**

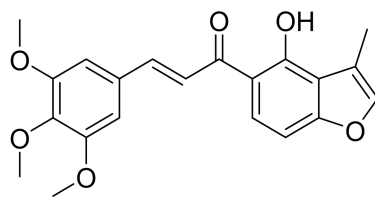

Yellow solid. Yield: 87%. m.p. 146.6-147.6 °C. <sup>1</sup>H NMR (500 MHz, Chloroform-*d*) δ 14.01 (s, 1H), 7.86 – 7.76 (m, 2H), 7.54 (d, *J* = 15.3 Hz, 1H), 7.30 (d, *J* = 1.7 Hz, 1H), 7.00 (d, *J* = 8.8 Hz, 1H), 6.88 (s, 2H), 3.94 (s, 6H), 3.92 (s, 3H), 2.44 (d, *J* = 1.5 Hz, 3H). <sup>13</sup>C NMR (126 MHz, Chloroform-*d*) δ 193.42, 161.95, 160.44, 154.41, 144.57, 140.74, 132.02, 128.47, 125.99, 125.96, 119.86, 118.10, 117.31, 114.27, 103.68, 34.98, 31.15, 9.63. HRMS (EI) *m/z*: 368.1262 (M<sup>+</sup>); calc. for C<sub>21</sub>H<sub>20</sub>O<sub>6</sub>: 368.1260.

**(*E*)-3-(2,4-dichlorophenyl)-1-(4-hydroxy-3-methylbenzofuran-5-yl)prop-2-en-1-one (11u)**

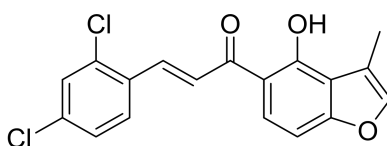

Yellow solid. Yield: 80%. m.p. 184.1-185.1 °C. <sup>1</sup>H NMR (400 MHz, Chloroform-*d*) δ 13.84 (s, 1H), 8.24 (d, *J* = 15.5 Hz, 1H), 7.83 – 7.59 (m, 3H), 7.51 (d, *J* = 2.1 Hz, 1H), 7.37 – 7.31 (m, 2H), 7.02 (d, *J* = 8.9 Hz, 1H), 2.47 (d, *J* = 1.4 Hz, 3H). <sup>13</sup>C NMR (101 MHz, Chloroform-*d*) δ 192.26, 161.63, 160.15, 140.43, 138.52, 136.14, 135.69, 131.22, 129.73, 128.10, 127.09, 125.47, 123.27, 117.69, 116.86, 113.62, 103.47, 9.14. HRMS (EI) *m/z*: 346.0163 (M<sup>+</sup>); calc. for C<sub>18</sub>H<sub>12</sub>Cl<sub>2</sub>O<sub>3</sub>: 346.016.

**(*E*)-3-(2-bromo-4-fluorophenyl)-1-(4-hydroxy-3-methylbenzofuran-5-yl)prop-2-en-1-one (11v)**

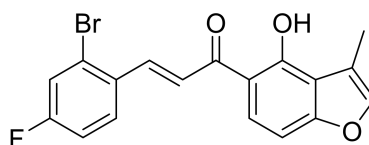

Yellow solid. Yield: 82%. m.p. 176.2-178.1 °C. <sup>1</sup>H NMR (400 MHz, Chloroform-*d*) δ 13.82 (s, 1H), 8.17 (d, *J* = 15.3 Hz, 1H), 7.75 (t, *J* = 8.4 Hz, 2H), 7.53 (d, *J* = 15.4 Hz, 1H), 7.39 (dd, *J* = 8.2, 2.5 Hz, 1H), 7.30 (s, 1H), 7.16 – 7.05 (m, 1H), 6.98 (d, *J* = 8.9 Hz, 1H), 2.43 (s, 3H). <sup>13</sup>C NMR (101 MHz, Chloroform-*d*) δ 192.77, 164.49, 162.09, 160.61, 141.60, 140.91, 131.30 (d, *J* = 3.5 Hz), 129.15 (d, *J* = 8.9 Hz), 126.40 (d, *J* = 9.6 Hz), 125.98, 123.41 (d, *J* = 2.07 Hz), 120.88 (d, *J* = 24.6 Hz), 118.18, 117.37, 115.35 (d, *J* = 21.6 Hz), 114.10, 103.92, 9.63. HRMS (EI) *m/z*: 373.9955 (M<sup>+</sup>); calc. for C<sub>18</sub>H<sub>13</sub>BrFO<sub>3</sub>: 373.9954.

**(*E*)-3-(3-chlorophenyl)-1-(4-hydroxy-3-methylbenzofuran-5-yl)prop-2-en-1-one (11w)**

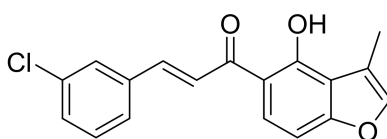

Yellow solid. Yield: 81%. m.p. 140.9-142.5 °C. <sup>1</sup>H NMR (400 MHz, Chloroform-*d*) δ 13.86 (s,

1H), 7.85 – 7.72 (m, 2H), 7.63 (t,  $J = 7.6$  Hz, 2H), 7.50 (d,  $J = 7.0$  Hz, 1H), 7.42 – 7.27 (m, 3H), 6.99 (d,  $J = 8.8$  Hz, 1H), 2.43 (s, 3H).  $^{13}\text{C}$  NMR (101 MHz, Chloroform-*d*)  $\delta$  192.88, 162.05, 160.60, 142.75, 140.87, 136.59, 135.01, 130.45, 130.22, 127.92, 126.92, 125.97, 122.07, 118.13, 117.32, 114.13, 103.90, 9.60. HRMS (EI)  $m/z$ : 312.0554 ( $\text{M}^+$ ); calc. for  $\text{C}_{18}\text{H}_{13}\text{ClO}_3$ : 312.0553.

**(*E*)-3-(3-bromophenyl)-1-(4-hydroxy-3-methylbenzofuran-5-yl)prop-2-en-1-one (11x)**

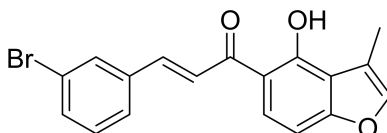

Yellow solid. Yield: 80%. m.p. 157.1-158.1 °C.  $^1\text{H}$  NMR (400 MHz, Chloroform-*d*)  $\delta$  13.79 (s, 1H), 7.80 – 7.62 (m, 3H), 7.55 (d,  $J = 15.4$  Hz, 1H), 7.51 – 7.41 (m, 2H), 7.21 (d,  $J = 7.4$  Hz, 2H), 6.92 (d,  $J = 8.8$  Hz, 1H), 2.35 (s, 3H).  $^{13}\text{C}$  NMR (101 MHz, Chloroform-*d*)  $\delta$  191.81, 161.01, 159.56, 141.60, 139.83, 135.83, 132.32, 129.80, 129.44, 126.35, 124.94, 122.09, 121.03, 117.09, 116.28, 113.09, 102.87, 8.57. HRMS (EI)  $m/z$ : 356.0045 ( $\text{M}^+$ ); calc. for  $\text{C}_{18}\text{H}_{13}\text{BrO}_3$ : 356.0048.

**(*E*)-1-(4-hydroxy-3-methylbenzofuran-5-yl)-3-(*m*-tolyl)prop-2-en-1-one (11y)**

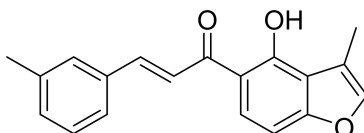

Yellow solid. Yield: 84%. m.p. 107.8-108.8 °C.  $^1\text{H}$  NMR (400 MHz, Chloroform-*d*)  $\delta$  14.00 (s, 1H), 7.88 (d,  $J = 15.5$  Hz, 1H), 7.79 (d,  $J = 8.9$  Hz, 1H), 7.65 (d,  $J = 15.5$  Hz, 1H), 7.46 (d,  $J = 7.7$  Hz, 2H), 7.34 – 7.28 (m, 2H), 7.24 (d,  $J = 7.5$  Hz, 1H), 6.99 (d,  $J = 8.9$  Hz, 1H), 2.44 (d,  $J = 1.4$  Hz, 3H), 2.41 (s, 3H).  $^{13}\text{C}$  NMR (101 MHz, Chloroform-*d*)  $\delta$  193.38, 161.99, 160.49, 144.80, 140.78, 138.68, 134.73, 131.60, 129.11, 128.90, 126.03, 125.91, 120.52, 118.11, 117.33, 114.26, 103.73, 21.38, 9.65. HRMS (EI)  $m/z$ : 292.1100 ( $\text{M}^+$ ); calc. for  $\text{C}_{19}\text{H}_{16}\text{O}_3$ : 292.1099.

**(*E*)-1-(4-hydroxy-3-methylbenzofuran-5-yl)-3-(3-methoxyphenyl)prop-2-en-1-one (11z)**

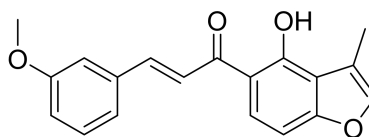

Yellow solid. Yield: 86%. m.p. 91.7-98.2 °C.  $^1\text{H}$  NMR (400 MHz, Chloroform-*d*)  $\delta$  13.96 (s, 1H), 7.86 (d,  $J = 15.4$  Hz, 1H), 7.77 (d,  $J = 9.0$  Hz, 1H), 7.62 (d,  $J = 15.4$  Hz, 1H), 7.34 (t,  $J = 7.9$  Hz, 1H), 7.29 (q,  $J = 1.4$  Hz, 1H), 7.27 – 7.23 (m, 1H), 7.16 (t,  $J = 2.0$  Hz, 1H), 7.01 – 6.92 (m, 2H), 3.86 (s, 3H), 2.43 (d,  $J = 1.3$  Hz, 3H).  $^{13}\text{C}$  NMR (101 MHz, Chloroform-*d*)  $\delta$  193.27, 162.00, 160.51, 159.95, 144.48, 140.81, 136.14, 129.99, 126.00, 121.19, 121.02, 118.11, 117.32, 116.40, 114.22, 113.61, 103.77, 55.38, 9.63. HRMS (EI)  $m/z$ : 308.1052 ( $\text{M}^+$ ); calc. for  $\text{C}_{19}\text{H}_{16}\text{O}_4$ : 308.1049.

**(*E*)-3-(furan-2-yl)-1-(4-hydroxy-3-methylbenzofuran-5-yl)prop-2-en-1-one (11aa)**

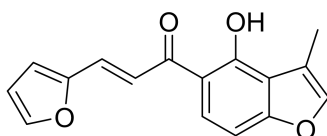

Yellow solid. Yield: 77%. m.p. 123.4-125.2 °C. <sup>1</sup>H NMR (400 MHz, Chloroform-*d*) δ 14.05 (s, 1H), 7.79 (d, *J* = 9.0 Hz, 1H), 7.68 (d, *J* = 15.1 Hz, 1H), 7.63 – 7.52 (m, 2H), 7.29 (q, *J* = 1.4 Hz, 1H), 6.98 (d, *J* = 8.9 Hz, 1H), 6.75 (d, *J* = 3.4 Hz, 1H), 6.53 (dd, *J* = 3.4, 1.8 Hz, 1H), 2.44 (d, *J* = 1.4 Hz, 3H). <sup>13</sup>C NMR (101 MHz, Chloroform-*d*) δ 192.94, 161.93, 160.50, 151.66, 145.21, 140.75, 130.41, 126.02, 118.31, 118.06, 117.31, 116.67, 114.26, 112.81, 103.75, 9.66. HRMS (EI) *m/z*: 268.0735 (M<sup>+</sup>); calc. for C<sub>16</sub>H<sub>12</sub>O<sub>4</sub>: 268.0736.

**(E)-1-(4-hydroxy-3-methylbenzofuran-5-yl)-3-(thiophen-2-yl)prop-2-en-1-one (11ab)**

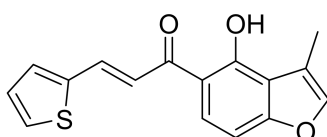

Dark red solid. Yield: 79%. m.p. 126.0-127.2 °C. <sup>1</sup>H NMR (400 MHz, Chloroform-*d*) δ 14.04 (s, 1H), 8.07 (dt, *J* = 15.1, 0.7 Hz, 1H), 7.78 (d, *J* = 8.9 Hz, 1H), 7.51 – 7.44 (m, 2H), 7.41 (dt, *J* = 3.4, 0.9 Hz, 1H), 7.32 (q, *J* = 1.4 Hz, 1H), 7.14 (dd, *J* = 5.0, 3.6 Hz, 1H), 7.02 (d, *J* = 8.9 Hz, 1H), 2.46 (d, *J* = 1.4 Hz, 3H). <sup>13</sup>C NMR (101 MHz, Chloroform-*d*) δ 192.25, 161.45, 160.00, 140.29, 139.84, 136.55, 131.89, 128.72, 127.96, 125.39, 119.01, 117.61, 116.82, 113.63, 103.27, 9.15. HRMS (EI) *m/z*: 284.0506 (M<sup>+</sup>); calc. for C<sub>16</sub>H<sub>12</sub>O<sub>3</sub>S: 284.0507.

**General procedure for the synthesis of angular 3-methylfuranoflavonols**

To a stirred solution of corresponding angular 3-methylfuranochalcones (1 mmol) in THF (3 mL), methanol (5 mL) and 25% aqueous sodium hydroxide solution (2 mmol) at 0 °C was added dropwise 30% aqueous H<sub>2</sub>O<sub>2</sub> (2.2 mmol). The solution was sealed and stirred at 0 °C for the 1 h then stirred at room temperature for **48** h. The product precipitated from the solution as it was formed. After being acidified with 2 M HCl, the resulting flavonols were filtered from aqueous solution. The crude product was recrystallized from EtOH to afford the pure product as a colorful solid. Target compounds **12a-12j** were obtained using this procedure.

**3-hydroxy-9-methyl-2-(p-tolyl)-4H-furo[2,3-*h*]chromen-4-one (12a)**

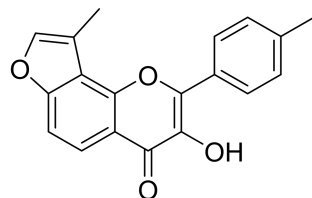

Yellowish brown solid. Yield: 75%. m.p. 238.9-241.5 °C. <sup>1</sup>H NMR (400 MHz, DMSO-*d*<sub>6</sub>) δ 9.55 (s, 1H), 8.13 – 8.07 (m, 2H), 7.99 – 7.94 (m, 2H), 7.63 (d, *J* = 8.8 Hz, 1H), 7.39 (d, *J* = 8.2 Hz, 2H), 2.55 (d, *J* = 1.4 Hz, 3H), 2.38 (s, 3H). <sup>13</sup>C NMR (101 MHz, DMSO-*d*<sub>6</sub>) δ 172.60, 157.65, 150.23, 144.83, 143.22, 139.54, 138.75, 129.18, 128.55, 127.16, 120.90, 117.14, 116.69, 115.36, 109.93, 20.99, 9.71. HRMS (EI) *m/z*: 306.0898 (M<sup>+</sup>); calc. for C<sub>19</sub>H<sub>14</sub>O<sub>4</sub>: 306.0892.



**2-(2,4-dimethylphenyl)-3-hydroxy-9-methyl-4H-furo[2,3-*h*]chromen-4-one (12b)**

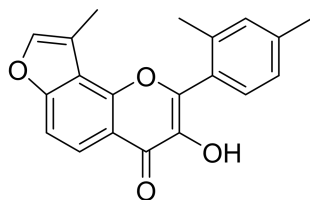

Yellowish brown solid. Yield: 70%. m.p. 234.6-236.4 °C. <sup>1</sup>H NMR (400 MHz, Chloroform-*d*) δ 8.17 (d, *J* = 8.9 Hz, 1H), 7.60 – 7.38 (m, 3H), 7.23 – 7.07 (m, 2H), 6.64 (s, 1H), 2.52 – 2.29 (m, 9H).

<sup>13</sup>C NMR (101 MHz, Chloroform-*d*) δ 173.11, 158.58, 152.05, 146.97, 142.11, 140.47, 138.37, 137.46, 131.62, 129.65, 127.25, 126.60, 121.42, 117.73, 116.52, 116.16, 110.26, 21.43, 19.96, 9.70. HRMS (EI) *m/z*: 320.1051 (M<sup>+</sup>); calc. for C<sub>20</sub>H<sub>16</sub>O<sub>4</sub>: 320.1049.

**3-hydroxy-2-mesityl-9-methyl-4H-furo[2,3-*h*]chromen-4-one (12c)**

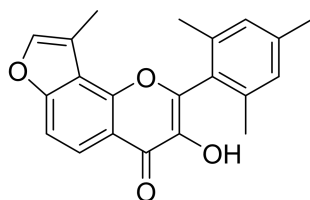

White solid. Yield: 78%. m.p. 189.1-190.1 °C.

<sup>1</sup>H NMR (500 MHz, Chloroform-*d*) δ 8.18 (d, *J* = 8.9 Hz, 1H), 7.53 (d, *J* = 8.9 Hz, 1H), 7.47 (p, *J* = 1.2 Hz, 1H), 7.02 (s, 2H), 6.46 (s, 1H), 2.39 – 2.34 (m, 6H), 2.27 (s, 6H). <sup>13</sup>C NMR (101 MHz, Chloroform-*d*) δ 173.03, 158.54, 152.30, 146.75, 142.07, 140.18, 137.64, 128.58, 126.58, 123.68, 121.41, 117.80, 116.73, 116.22, 110.28, 21.31, 19.72, 9.65. HRMS (EI) *m/z*: 334.1207 (M<sup>+</sup>); calc. for C<sub>21</sub>H<sub>18</sub>O<sub>4</sub>: 334.1205.

**3-hydroxy-2-(4-isopropylphenyl)-9-methyl-4H-furo[2,3-*h*]chromen-4-one (12d)**

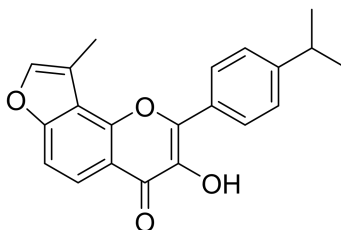

Yellowish brown solid. Yield: 72%. m.p. 249.0-251.4 °C. <sup>1</sup>H NMR (400 MHz, Chloroform-*d*) δ 8.32 – 7.99 (m, 3H), 7.47 (dd, *J* = 27.2, 9.3 Hz, 4H), 7.12 (s, 1H), 3.02 (d, *J* = 9.0 Hz, 1H), 2.66 (s, 3H), 1.32 (d, *J* = 6.9 Hz, 6H). <sup>13</sup>C NMR (101 MHz, Chloroform-*d*) δ 173.38, 158.70, 151.55, 151.20, 142.18, 138.28, 128.81, 127.48, 126.88, 123.89, 121.37, 117.77, 116.76, 115.94, 110.30, 34.16, 23.82, 10.31. HRMS (EI) *m/z*: 334.1213 (M<sup>+</sup>); calc. for C<sub>21</sub>H<sub>18</sub>O<sub>4</sub>: 334.1205.

**2-(4-(tert-butyl)phenyl)-3-hydroxy-9-methyl-4H-furo[2,3-*h*]chromen-4-one (12e)**

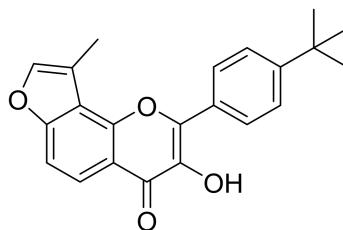

Orange solid. Yield: 59%. m.p. 167.1-168.1 °C. <sup>1</sup>H NMR (500 MHz, Chloroform-*d*) δ 8.21 (d, *J* = 8.1 Hz, 2H), 8.13 (d, *J* = 8.7 Hz, 1H), 7.60 (d, *J* = 8.2 Hz, 2H), 7.55 – 7.44 (m, 2H), 7.12 (s, 1H), 2.66 (s, 3H), 1.39 (s, 9H). <sup>13</sup>C NMR (126 MHz, Chloroform-*d*) δ 158.71, 158.70, 153.43, 151.54, 151.54, 142.17, 128.43, 128.43, 127.19, 125.74, 121.37, 117.74, 115.94, 110.27, 34.95, 34.95, 31.18, 10.30. HRMS (EI) *m/z*: 348.1366 (M<sup>+</sup>); calc. for C<sub>22</sub>H<sub>20</sub>O<sub>4</sub>: 348.1362.

**3-hydroxy-2-(4-methoxyphenyl)-9-methyl-4H-furo[2,3-*h*]chromen-4-one (12f)**

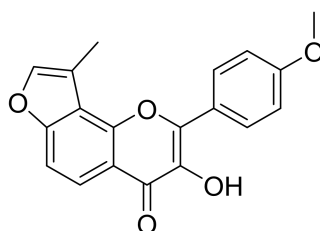

Lightgray solid. Yield: 65%. m.p. 250.7-252.8 °C. <sup>1</sup>H NMR (400 MHz, DMSO-*d*<sub>6</sub>) δ 9.45 (s, 1H), 8.16 (d, *J* = 8.5 Hz, 2H), 7.99 – 7.87 (m, 2H), 7.60 (d, *J* = 8.8 Hz, 1H), 7.14 (d, *J* = 8.5 Hz, 2H), 3.85 (s, 3H), 2.55 (s, 3H). <sup>13</sup>C NMR (101 MHz, DMSO-*d*<sub>6</sub>) δ 172.39, 160.18, 157.57, 150.09, 144.90, 143.12, 138.14, 128.90, 123.62, 120.84, 117.09, 116.68, 115.33, 114.06, 109.79, 55.29, 9.77. HRMS (EI) *m/z*: 322.0851 (M<sup>+</sup>); calc. for C<sub>19</sub>H<sub>14</sub>O<sub>5</sub>: 322.0841.

**3-hydroxy-2-(2-methoxyphenyl)-9-methyl-4H-furo[2,3-*h*]chromen-4-one (12g)**

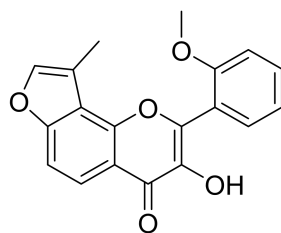

Pink solid. Yield: 70%. m.p. 238.5-240.5 °C. <sup>1</sup>H NMR (400 MHz, Chloroform-*d*) δ 8.15 (d, *J* = 8.8 Hz, 1H), 7.69 (d, *J* = 7.5 Hz, 1H), 7.50 (dd, *J* = 16.2, 7.5 Hz, 3H), 7.18 – 7.05 (m, 2H), 3.91 (s, 3H), 2.44 (s, 3H). <sup>13</sup>C NMR (101 MHz, Chloroform-*d*) δ 173.27, 158.46, 157.46, 152.09, 144.87, 141.93, 138.78, 131.95, 131.08, 121.37, 120.53, 119.58, 117.81, 116.53, 116.40, 111.68, 110.11, 55.69, 9.42. HRMS (EI) *m/z*: 322.0841 (M<sup>+</sup>); calc. for C<sub>19</sub>H<sub>14</sub>O<sub>5</sub>: 322.0841.

**3-hydroxy-9-methyl-2-(3,4,5-trimethoxyphenyl)-4H-furo[2,3-*h*]chromen-4-one (12h)**

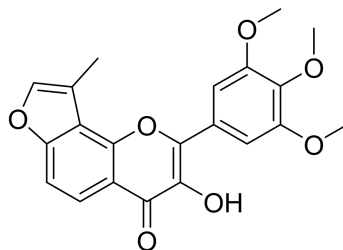

Yellow solid. Yield: 75%. m.p. 208.6-209.8 °C. <sup>1</sup>H NMR (400 MHz, Chloroform-*d*) δ 7.74 (s, 2H), 7.67 (d, *J* = 8.8 Hz, 1H), 7.50 (q, *J* = 1.3 Hz, 1H), 7.44 (d, *J* = 8.7 Hz, 1H), 4.01 (s, 6H), 3.98 (s, 3H), 2.55 (d, *J* = 1.3 Hz, 3H). <sup>13</sup>C NMR (101 MHz, Chloroform-*d*) δ 178.25, 161.53, 158.43, 153.10, 150.38, 141.94, 135.71, 129.92, 116.76, 114.88, 114.47, 114.19, 109.08, 106.79, 106.75, 61.04, 56.17, 9.45. HRMS (EI) *m/z*: 382.1053 (M<sup>+</sup>); calc. for C<sub>21</sub>H<sub>18</sub>O<sub>7</sub>: 382.1053.

**2-(4-(dimethylamino)phenyl)-3-hydroxy-9-methyl-4H-furo[2,3-*h*]chromen-4-one (12i)**

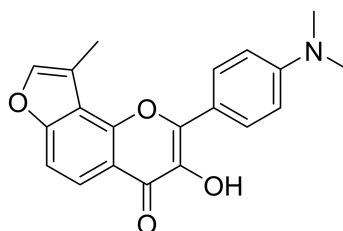

Yellow solid. Yield: 65%. m.p. 277.6-279.1 °C. <sup>1</sup>H NMR (400 MHz, Chloroform-*d*) δ 8.16 (dd, *J* = 34.8, 8.7 Hz, 3H), 7.56 – 7.41 (m, 2H), 7.05 (s, 1H), 6.94 – 6.80 (m, 2H), 3.09 (s, 6H), 2.66 (s, 3H). <sup>13</sup>C NMR (101 MHz, Chloroform-*d*) δ 172.18, 159.03, 158.01, 152.56, 150.73, 141.53, 136.03, 128.33, 127.78, 120.80, 117.17, 115.60, 115.39, 111.77, 109.46, 40.07, 9.90. HRMS (EI) *m/z*: 335.1157 (M<sup>+</sup>); calc. for C<sub>20</sub>H<sub>17</sub>NO<sub>4</sub>: 335.1158.

**2-(4-(diethylamino)phenyl)-3-hydroxy-9-methyl-4H-furo[2,3-*h*]chromen-4-one (12j)**

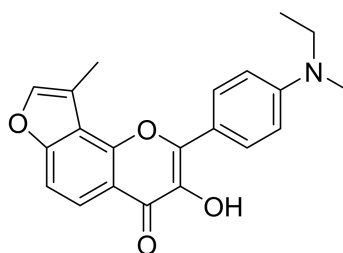

Yellow solid. Yield: 67%. m.p. 253.8-254.5 °C. <sup>1</sup>H NMR (400 MHz, Chloroform-*d*) δ 8.14 (dd, *J* = 23.0, 8.7 Hz, 3H), 7.54 – 7.42 (m, 2H), 7.02 (s, 1H), 6.80 (d, *J* = 8.7 Hz, 2H), 3.46 (q, *J* = 7.1 Hz, 4H), 2.66 (d, *J* = 1.2 Hz, 3H), 1.24 (t, *J* = 7.1 Hz, 6H). <sup>13</sup>C NMR (101 MHz, Chloroform-*d*) δ 172.49, 158.42, 151.12, 148.47, 146.06, 141.95, 136.71, 129.07, 124.65, 121.25, 117.63, 116.12, 111.07, 109.81, 103.60, 44.47, 12.64, 10.42. HRMS (EI) *m/z*: 363.1473 (M<sup>+</sup>); calc. for C<sub>22</sub>H<sub>21</sub>NO<sub>4</sub>: 363.1471.

**General procedure for the synthesis of angular 3-methylfuranoflavones**

The mixture of dry DMSO (5.2 mL) and NaH (36.4 mmol, 60% dispersion in mineral oil) in dry toluene (60 mL) was heated under N<sub>2</sub> at 80 °C for 2 h. The solution was cooled to 40 °C, and to

the stirred solution was added dropwise a solution of **9** (7.2 mmol) in dry toluene (8 mL). The reaction mixture was then stirred for at 40 °C for 1 h, diluted with ether (75 mL), and quenched with a saturated solution of NH<sub>4</sub>Cl (60 mL). The organic layer was separated, and the aqueous layer was extracted with ether (30 mL × 3). The combined organic layer was washed with brine, dried over Na<sub>2</sub>SO<sub>4</sub>, and concentrated in vacuo. The resulting residue was purified by column chromatography to afford **13** (95%) as a yellow solid.

To the warm solution (40 °C) of **13** (0.42 mmol) in dry toluene (15 mL) containing a catalytic amount of piperidine (4 drops) was added dropwise a solution of substituted benzaldehyde (4.2 mmol) in dry toluene. The resulting mixture was allowed to reflux for 3 h. After the solvent was removed under reduced pressure, the residue was added 10 mL EtOH and stirred to precipitation. The resulting precipitate was filtrated, then washed with EtOH to afford pure product as a colorful solid. Products **14a-14ab** were obtained in this way, which were pure enough for most purposes.

### 1-(4-hydroxy-3-methylbenzofuran-5-yl)-2-(methylsulfinyl)ethan-1-one (**13**)

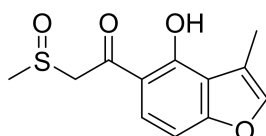

Yellow solid. Yield: 95%. m.p. 142.9-143.6 °C. <sup>1</sup>H NMR (400 MHz, Chloroform-*d*) δ 12.80 (s, 1H), 7.57 (d, *J* = 8.9 Hz, 1H), 7.31 (t, *J* = 1.6 Hz, 1H), 7.00 (d, *J* = 9.0 Hz, 1H), 4.45 (d, *J* = 13.9 Hz, 1H), 4.31 (d, *J* = 13.9 Hz, 1H), 2.78 (s, 3H), 2.39 (d, *J* = 1.3 Hz, 3H). <sup>13</sup>C NMR (101 MHz, Chloroform-*d*) δ 196.19, 161.31, 161.14, 141.28, 127.18, 118.00, 117.30, 113.94, 104.80, 62.05, 39.44, 9.53.

### 9-methyl-2-(*p*-tolyl)-4*H*-furo[2,3-*h*]chromen-4-one (**14a**)

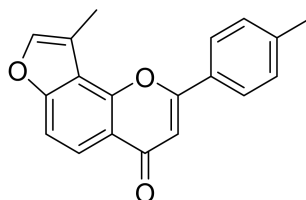

White solid. Yield: 87%. m.p. 170.1-172.1 °C. <sup>1</sup>H NMR (400 MHz, Chloroform-*d*) δ 8.09 (d, *J* = 8.8 Hz, 1H), 7.82 – 7.74 (m, 2H), 7.52 – 7.39 (m, 2H), 7.32 (d, *J* = 8.0 Hz, 2H), 6.81 (s, 1H), 2.59 (d, *J* = 1.3 Hz, 3H), 2.43 (s, 3H). <sup>13</sup>C NMR (101 MHz, Chloroform-*d*) δ 178.15, 162.77, 158.82, 151.89, 142.24, 142.08, 129.87, 128.98, 125.90, 121.57, 119.17, 117.73, 115.73, 110.11, 107.25, 21.53, 10.21. HRMS (EI) *m/z*: 290.0944 (M<sup>+</sup>); calc. for C<sub>19</sub>H<sub>14</sub>O<sub>3</sub>: 290.0943.

### 2-(2,4-dimethylphenyl)-9-methyl-4*H*-furo[2,3-*h*]chromen-4-one (**14b**)

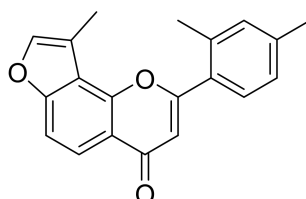

White solid. Yield: 89%. m.p. 200.8-201.6 °C. <sup>1</sup>H NMR (400 MHz, Chloroform-*d*) δ 8.16 (d, *J* = 8.8 Hz, 1H), 7.52 – 7.45 (m, 3H), 7.16 (d, *J* = 7.9 Hz, 2H), 6.52 (s, 1H), 2.49 (s, 3H), 2.45 (d, *J* =

1.4 Hz, 3H), 2.41 (s, 3H).  $^{13}\text{C}$  NMR (101 MHz,  $\text{DMSO-}d_6$ )  $\delta$  177.57, 164.59, 158.38, 151.91, 141.74, 140.42, 135.96, 131.58, 129.52, 128.68, 126.53, 121.17, 118.53, 117.23, 115.41, 112.01, 109.73, 20.85, 19.96, 9.30. HRMS (EI)  $m/z$ : 304.1102 ( $\text{M}^+$ ); calc. for  $\text{C}_{20}\text{H}_{16}\text{O}_3$ : 304.1099.

**2-mesityl-9-methyl-4H-furo[2,3-*h*]chromen-4-one (14c)**

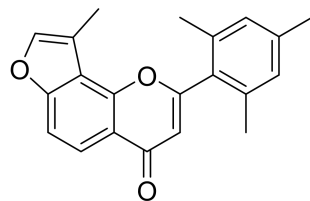

Yellowish brown solid. Yield: 83%. m.p. 215.1-216.1 °C.  $^1\text{H}$  NMR (400 MHz, Chloroform-*d*)  $\delta$  8.17 (d,  $J = 8.8$  Hz, 1H), 7.56 – 7.42 (m, 2H), 7.37 (s, 1H), 7.13 (s, 1H), 6.56 (s, 1H), 2.49 – 2.43 (m, 6H), 2.32 (d,  $J = 4.5$  Hz, 6H).  $^{13}\text{C}$  NMR (101 MHz, Chloroform-*d*)  $\delta$  178.11, 165.26, 158.87, 142.19, 139.57, 134.52, 133.79, 132.62, 130.30, 130.21, 121.68, 119.06, 115.91, 112.40, 110.18, 19.92, 19.65, 19.27, 9.78. HRMS (EI)  $m/z$ : 318.1259 ( $\text{M}^+$ ); calc. for  $\text{C}_{21}\text{H}_{18}\text{O}_3$ : 318.1256.

**2-(4-isopropylphenyl)-9-methyl-4H-furo[2,3-*h*]chromen-4-one (14d)**

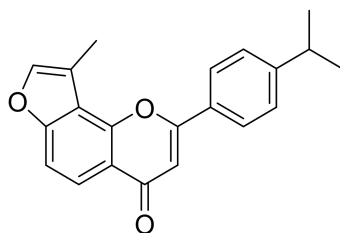

White solid. Yield: 90%. m.p. 175.2-177.2 °C.  $^1\text{H}$  NMR (400 MHz, Chloroform-*d*)  $\delta$  8.12 (d,  $J = 8.8$  Hz, 1H), 7.90 – 7.83 (m, 2H), 7.52 – 7.37 (m, 4H), 6.87 (s, 1H), 3.01 (hept,  $J = 6.9$  Hz, 1H), 2.63 (d,  $J = 1.4$  Hz, 3H), 1.31 (d,  $J = 6.9$  Hz, 6H).  $^{13}\text{C}$  NMR (101 MHz, Chloroform-*d*)  $\delta$  178.23, 162.90, 158.87, 152.94, 151.98, 142.26, 129.36, 127.32, 126.13, 121.60, 119.18, 117.78, 115.76, 110.17, 107.35, 34.16, 23.75, 10.23. HRMS (EI)  $m/z$ : 318.1255 ( $\text{M}^+$ ); calc. for  $\text{C}_{21}\text{H}_{18}\text{O}_3$ : 318.1256.

**2-(4-(tert-butyl)phenyl)-9-methyl-4H-furo[2,3-*h*]chromen-4-one (14e)**

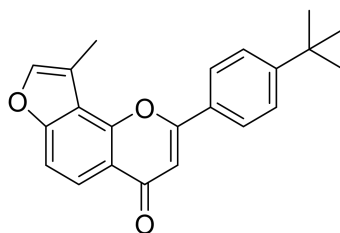

Yellowish brown solid. Yield: 80%. m.p. 238.1-239.1 °C.  $^1\text{H}$  NMR (400 MHz, Chloroform-*d*)  $\delta$  8.12 (d,  $J = 8.7$  Hz, 1H), 7.89 – 7.84 (m, 2H), 7.60 – 7.55 (m, 2H), 7.49 (q,  $J = 1.3$  Hz, 1H), 7.46 (d,  $J = 8.7$  Hz, 1H), 6.86 (s, 1H), 2.63 (d,  $J = 1.3$  Hz, 3H), 1.38 (s, 9H).  $^{13}\text{C}$  NMR (101 MHz, Chloroform-*d*)  $\delta$  178.22, 162.81, 158.87, 155.20, 151.98, 142.25, 128.99, 126.19, 125.86, 121.61, 119.22, 117.79, 115.78, 110.15, 107.41, 35.06, 31.15, 10.25. HRMS (EI)  $m/z$ : 332.1417 ( $\text{M}^+$ ); calc. for  $\text{C}_{22}\text{H}_{20}\text{O}_3$ : 332.1412.

**2-(4-methoxyphenyl)-9-methyl-4H-furo[2,3-*h*]chromen-4-one (14f)**

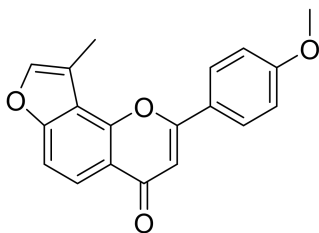

White solid. Yield: 90%. m.p. 224.0-225.5 °C. <sup>1</sup>H NMR (400 MHz, Chloroform-*d*) δ 8.11 (d, *J* = 8.7 Hz, 1H), 7.93 – 7.81 (m, 2H), 7.55 – 7.40 (m, 2H), 7.10 – 6.98 (m, 2H), 6.81 (s, 1H), 3.90 (s, 3H), 2.62 (d, *J* = 1.4 Hz, 3H). <sup>13</sup>C NMR (101 MHz, Chloroform-*d*) δ 178.14, 162.75, 162.29, 158.85, 151.89, 142.25, 127.71, 124.06, 121.59, 119.05, 117.72, 115.69, 114.60, 110.12, 106.44, 55.53, 10.30. HRMS (EI) *m/z*: 306.0895 (M<sup>+</sup>); calc. for C<sub>19</sub>H<sub>14</sub>O<sub>4</sub>: 306.0892.

**2-(2-methoxyphenyl)-9-methyl-4H-furo[2,3-*h*]chromen-4-one (14g)**

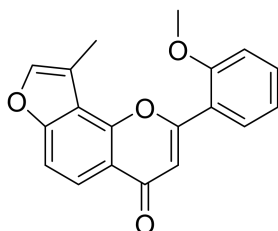

White solid. Yield: 92%. m.p. 242.7-244.8 °C. <sup>1</sup>H NMR (400 MHz, Chloroform-*d*) δ 8.14 (d, *J* = 8.8 Hz, 1H), 7.90 (dd, *J* = 7.8, 1.8 Hz, 1H), 7.55 – 7.43 (m, 3H), 7.20 (s, 1H), 7.16 – 7.04 (m, 2H), 3.96 (s, 3H), 2.56 (d, *J* = 1.4 Hz, 3H). <sup>13</sup>C NMR (101 MHz, Chloroform-*d*) δ 178.63, 160.32, 158.82, 157.94, 152.27, 142.10, 132.33, 128.96, 121.62, 120.95, 120.79, 119.01, 117.72, 115.87, 112.93, 111.81, 110.03, 55.65, 10.00. HRMS (EI) *m/z*: 306.0886 (M<sup>+</sup>); calc. for C<sub>19</sub>H<sub>14</sub>O<sub>4</sub>: 306.0892.

**9-methyl-2-(3,4,5-trimethoxyphenyl)-4H-furo[2,3-*h*]chromen-4-one (14h)**

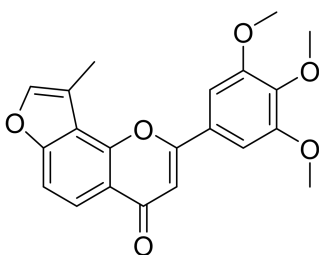

White solid. Yield: 95%. m.p. 239.1-241.9 °C. <sup>1</sup>H NMR (400 MHz, Chloroform-*d*) δ 8.11 (d, *J* = 8.8 Hz, 1H), 7.56 – 7.44 (m, 2H), 7.18 (s, 2H), 6.84 (s, 1H), 3.96 (s, 6H), 3.95 (s, 3H), 2.65 (d, *J* = 1.4 Hz, 3H). <sup>13</sup>C NMR (101 MHz, Chloroform-*d*) δ 178.10, 162.24, 158.93, 153.61, 151.84, 142.43, 140.99, 126.86, 121.63, 119.07, 117.70, 115.42, 110.31, 107.37, 103.28, 61.08, 56.21, 10.17. HRMS (EI) *m/z*: 366.1109 (M<sup>+</sup>); calc. for C<sub>21</sub>H<sub>18</sub>O<sub>6</sub>: 366.1103.

**2-(4-(dimethylamino)phenyl)-9-methyl-4H-furo[2,3-*h*]chromen-4-one (14i)**

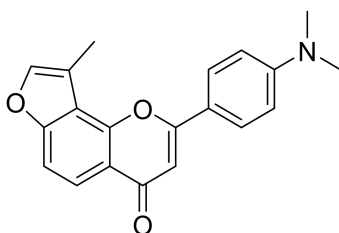

Yellow solid. Yield: 85%. m.p. 240.1-241.1 °C. <sup>1</sup>H NMR (400 MHz, Chloroform-*d*) δ 8.07 (d, *J* = 8.7 Hz, 1H), 7.77 – 7.66 (m, 2H), 7.44 (q, *J* = 1.2 Hz, 1H), 7.39 (d, *J* = 8.8 Hz, 1H), 6.71 – 6.64 (m, 3H), 3.00 (s, 6H), 2.57 (d, *J* = 1.4 Hz, 3H). <sup>13</sup>C NMR (101 MHz, Chloroform-*d*) δ 178.09, 163.54, 158.63, 152.14, 151.74, 142.00, 127.28, 121.47, 119.13, 118.11, 117.63, 115.74, 111.64, 109.62, 104.45, 40.02, 10.33. HRMS (EI) *m/z*: 319.1209 (M<sup>+</sup>); calc. for C<sub>20</sub>H<sub>17</sub>NO<sub>3</sub>: 319.1208.

**2-(4-(diethylamino)phenyl)-9-methyl-4H-furo[2,3-*h*]chromen-4-one (14j)**

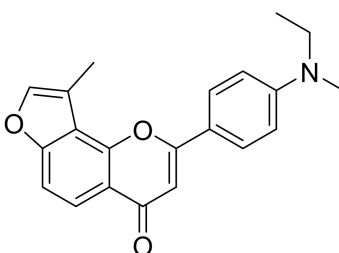

Yellow solid. Yield: 87%. m.p. 198.8-199.8 °C. <sup>1</sup>H NMR (400 MHz, Chloroform-*d*) δ 8.10 (d, *J* = 8.7 Hz, 1H), 7.83 – 7.72 (m, 2H), 7.55 – 7.36 (m, 2H), 6.73 (d, *J* = 10.8 Hz, 3H), 3.43 (q, *J* = 7.1 Hz, 4H), 2.62 (d, *J* = 1.3 Hz, 3H), 1.22 (t, *J* = 7.1 Hz, 6H). <sup>13</sup>C NMR (101 MHz, Chloroform-*d*) δ 178.12, 163.67, 158.66, 151.80, 149.93, 142.00, 127.67, 121.54, 119.18, 117.66, 115.76, 111.24, 111.22, 109.62, 104.27, 44.59, 12.57, 10.37. HRMS (EI) *m/z*: 347.1522 (M<sup>+</sup>); calc. for C<sub>22</sub>H<sub>21</sub>NO<sub>3</sub>: 347.1521.

**2-(4-fluorophenyl)-9-methyl-4H-furo[2,3-*h*]chromen-4-one (14k)**

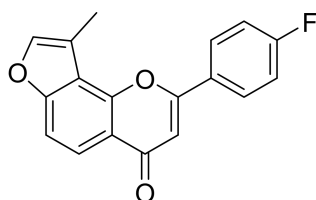

White solid. Yield: 83%. m.p. 250.1-251.1 °C, <sup>1</sup>H NMR (400 MHz, Acetone-*d*<sub>6</sub>) δ 7.94 (d, *J* = 7.2 Hz, 1H), 7.83 – 7.72 (m, 2H), 7.48 – 7.37 (m, 2H), 7.26 – 7.21 (m, 2H), 6.89 (s, 1H), 3.42 (d, *J* = 1.1 Hz, 3H). <sup>13</sup>C NMR (101 MHz, Chloroform-*d*) δ 178.04, 163.40, 161.75, 158.98, 151.93, 142.42, 128.21 (d, *J* = 8.8 Hz), 128.10 (d, *J* = 3.3 Hz), 121.65, 119.07, 117.76, 116.47 (d, *J* = 22.2 Hz), 115.63, 110.42, 107.74, 10.26. HRMS (EI) *m/z*: 294.0692 (M<sup>+</sup>); calc. for C<sub>18</sub>H<sub>11</sub>FO<sub>3</sub>: 294.0692.

**2-(4-chlorophenyl)-9-methyl-4H-furo[2,3-*h*]chromen-4-one (14l)**

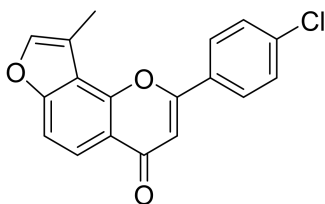

White solid. Yield: 86%. m.p. 242.8-243.1 °C. <sup>1</sup>H NMR (400 MHz, Chloroform-*d*) δ 8.10 (d, *J* = 8.8 Hz, 1H), 7.89 – 7.79 (m, 2H), 7.58 – 7.40 (m, 4H), 6.83 (s, 1H), 2.60 (d, *J* = 1.2 Hz, 3H). <sup>13</sup>C NMR (101 MHz, Chloroform-*d*) δ 178.01, 161.51, 158.98, 151.91, 142.44, 137.76, 130.37, 129.54, 127.25, 121.66, 117.77, 115.63, 110.45, 108.13, 10.26. HRMS (EI) *m/z*: 310.0399 (M<sup>+</sup>); calc. for C<sub>18</sub>H<sub>11</sub>ClO<sub>3</sub>: 310.0397.

**2-(4-bromophenyl)-9-methyl-4H-furo[2,3-*h*]chromen-4-one (14m)**

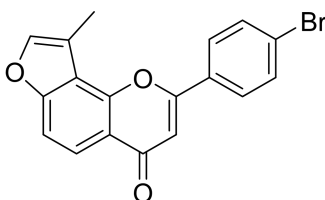

White solid. Yield: 83%. m.p. 293.1-294.1 °C. <sup>1</sup>H NMR (400 MHz, Chloroform-*d*) δ 8.12 (d, *J* = 8.8 Hz, 1H), 7.83 – 7.75 (m, 2H), 7.73 – 7.63 (m, 2H), 7.57 – 7.45 (m, 2H), 6.87 (s, 1H), 2.61 (d, *J* = 1.4 Hz, 3H). <sup>13</sup>C NMR (101 MHz, Chloroform-*d*) δ 177.97, 161.61, 158.99, 151.91, 142.45, 132.51, 130.81, 127.42, 126.19, 121.65, 119.14, 117.77, 115.63, 110.49, 108.09, 10.25. HRMS (EI) *m/z*: 353.9891 (M<sup>+</sup>); calc. for C<sub>18</sub>H<sub>11</sub>BrO<sub>3</sub>: 353.9892.

**2-(2-fluorophenyl)-9-methyl-4H-furo[2,3-*h*]chromen-4-one (14n)**

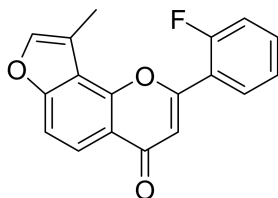

Light green solid. Yield: 85%. m.p. 195.1-196.1 °C. <sup>1</sup>H NMR (400 MHz, Chloroform-*d*) δ 8.10 (d, *J* = 8.7 Hz, 1H), 7.89 (td, *J* = 7.6, 1.7 Hz, 1H), 7.57 – 7.41 (m, 3H), 7.34 (td, *J* = 7.6, 1.1 Hz, 1H), 7.28 – 7.20 (m, 1H), 6.96 (s, 1H), 2.55 (d, *J* = 1.3 Hz, 3H). <sup>13</sup>C NMR (101 MHz, Chloroform-*d*) δ 178.04, 159.16, 158.89, 158.26, 152.03, 142.32, 132.82 (d, *J* = 9.1 Hz), 128.69 (d, *J* = 1.7 Hz), 124.75 (d, *J* = 3.7 Hz), 121.57, 120.40 (d, *J* = 10.1 Hz), 119.03, 117.71, 117.11 (d, *J* = 22.6 Hz), 115.83, 112.64 (d, *J* = 10.7 Hz), 110.35, 9.97. HRMS (EI) *m/z*: 294.0695 (M<sup>+</sup>); calc. for C<sub>18</sub>H<sub>11</sub>FO<sub>3</sub>: 294.0692.

**2-(2-chlorophenyl)-9-methyl-4H-furo[2,3-*h*]chromen-4-one (14o)**

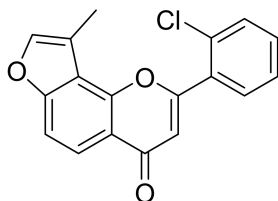

White solid. Yield: 86%. m.p. 201.0-201.6 °C.



$^1\text{H}$  NMR (400 MHz, Chloroform-*d*)  $\delta$  8.16 (d,  $J = 8.7$  Hz, 1H), 7.67 (dd,  $J = 7.3, 2.0$  Hz, 1H), 7.57 (dd,  $J = 7.9, 1.5$  Hz, 1H), 7.54 – 7.40 (m, 4H), 6.72 (s, 1H), 2.47 (d,  $J = 1.4$  Hz, 3H).  $^{13}\text{C}$  NMR (101 MHz, Chloroform-*d*)  $\delta$  177.91, 161.99, 158.94, 152.36, 142.26, 132.89, 132.01, 131.80, 130.92, 130.72, 127.23, 121.61, 119.08, 117.85, 116.13, 113.39, 110.43, 9.69. HRMS (EI)  $m/z$ : 310.0397 ( $\text{M}^+$ ); calc. for  $\text{C}_{18}\text{H}_{11}\text{ClO}_3$ : 310.0397.

**2-(2-bromophenyl)-9-methyl-4H-furo[2,3-*h*]chromen-4-one (14p)**

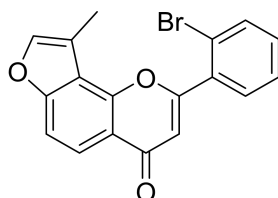

Yellowish solid. Yield: 89%. m.p. 189.3-191.0 °C.  $^1\text{H}$  NMR (400 MHz, Chloroform-*d*)  $\delta$  8.16 (d,  $J = 8.7$  Hz, 1H), 7.76 (dd,  $J = 8.1, 1.2$  Hz, 1H), 7.62 (dd,  $J = 7.6, 1.7$  Hz, 1H), 7.55 – 7.45 (m, 3H), 7.41 (td,  $J = 7.7, 1.8$  Hz, 1H), 6.65 (s, 1H), 2.47 (d,  $J = 1.3$  Hz, 3H).  $^{13}\text{C}$  NMR (101 MHz, Chloroform-*d*)  $\delta$  177.90, 163.24, 158.96, 152.34, 142.24, 134.19, 134.02, 131.90, 130.99, 127.75, 121.81, 121.62, 119.13, 117.87, 116.18, 113.26, 110.44, 9.74. HRMS (EI)  $m/z$ : 353.9893 ( $\text{M}^+$ ); calc. for  $\text{C}_{18}\text{H}_{11}\text{BrO}_3$ : 353.9892.

**2-(3-chlorophenyl)-9-methyl-4H-furo[2,3-*h*]chromen-4-one (14q)**

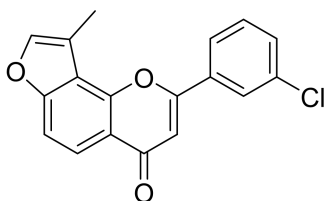

White solid. Yield: 86%. m.p. 272.1-273.1 °C.  $^1\text{H}$  NMR (400 MHz, Chloroform-*d*)  $\delta$  8.14 (d,  $J = 8.8$  Hz, 1H), 7.93 (t,  $J = 1.9$  Hz, 1H), 7.82 (dt,  $J = 7.4, 1.7$  Hz, 1H), 7.59 – 7.46 (m, 4H), 6.90 (s, 1H), 2.64 (d,  $J = 1.3$  Hz, 3H).  $^{13}\text{C}$  NMR (101 MHz, Chloroform-*d*)  $\delta$  177.98, 161.08, 159.04, 151.92, 142.50, 135.38, 133.69, 131.42, 130.49, 126.20, 124.09, 121.66, 119.19, 117.81, 115.68, 110.56, 108.56, 10.20. HRMS (EI)  $m/z$ : 310.0396 ( $\text{M}^+$ ); calc. for  $\text{C}_{18}\text{H}_{11}\text{ClO}_3$ : 310.0397.

**2-(3-bromophenyl)-9-methyl-4H-furo[2,3-*h*]chromen-4-one (14r)**

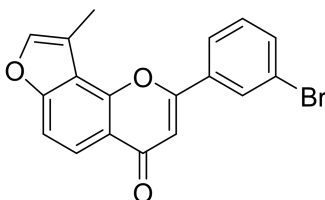

White solid. Yield: 89%. m.p. 239.8-239.9 °C.  $^1\text{H}$  NMR (400 MHz, Chloroform-*d*)  $\delta$  8.15 – 8.04 (m, 2H), 7.84 (dt,  $J = 7.9, 1.4$  Hz, 1H), 7.68 (ddd,  $J = 8.0, 1.9, 1.0$  Hz, 1H), 7.56 – 7.37 (m, 3H), 6.85 (s, 1H), 2.62 (d,  $J = 1.2$  Hz, 3H).  $^{13}\text{C}$  NMR (101 MHz, Chloroform-*d*)  $\delta$  177.91, 160.88, 159.01, 151.87, 142.49, 134.30, 133.87, 130.69, 129.11, 124.49, 123.33, 121.64, 119.18, 117.79, 115.66, 110.52, 108.54, 10.16. HRMS (EI)  $m/z$ : 353.9891 ( $\text{M}^+$ ); calc. for  $\text{C}_{18}\text{H}_{11}\text{BrO}_3$ : 353.9892.

**9-methyl-2-(m-tolyl)-4H-furo[2,3-h]chromen-4-one (14s)**

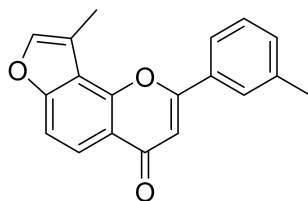

White solid. Yield: 85%. m.p. 170.8-172.0 °C.

<sup>1</sup>H NMR (400 MHz, Chloroform-*d*) δ 8.11 (d, *J* = 8.8 Hz, 1H), 7.75 – 7.69 (m, 2H), 7.50 (q, *J* = 1.4 Hz, 1H), 7.46 (d, *J* = 8.8 Hz, 1H), 7.45 – 7.40 (m, 1H), 7.36 (d, *J* = 7.6 Hz, 1H), 6.86 (s, 1H), 2.62 (d, *J* = 1.3 Hz, 3H), 2.46 (s, 3H).

<sup>13</sup>C NMR (101 MHz, Chloroform-*d*) δ 178.22, 162.81, 158.88, 151.97, 142.30, 138.91, 132.28, 131.79, 129.06, 126.68, 123.16, 121.60, 119.19, 117.78, 115.73, 110.22, 107.84, 21.61, 10.16. HRMS (EI) *m/z*: 290.0947 (M<sup>+</sup>); calc. for C<sub>19</sub>H<sub>14</sub>O<sub>3</sub>: 290.0943.

**2-(2-bromo-4-fluorophenyl)-9-methyl-4H-furo[2,3-h]chromen-4-one (14t)**

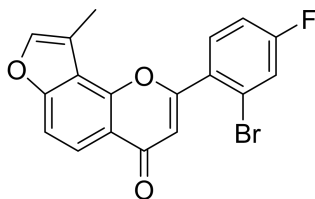

White solid. Yield: 83%. m.p. 207.5-208.4 °C.

<sup>1</sup>H NMR (400 MHz, Chloroform-*d*) δ 8.14 (d, *J* = 8.8 Hz, 1H), 7.63 (dd, *J* = 8.6, 5.8 Hz, 1H), 7.55 – 7.45 (m, 3H), 7.22 (ddd, *J* = 8.5, 7.7, 2.5 Hz, 1H), 6.62 (s, 1H), 2.46 (d, *J* = 1.3 Hz, 3H). <sup>13</sup>C NMR (101 MHz, Chloroform-*d*) δ 177.74, 162.26, 162.08, 158.96, 152.26, 142.31, 132.31 (d, *J* = 9.1 Hz), 130.56 (d, *J* = 3.8 Hz), 122.56 (d, *J* = 9.7 Hz), 121.60, 121.51 (d, *J* = 24.9 Hz), 119.06, 117.81, 116.07, 115.22 (d, *J* = 21.5 Hz), 113.37, 110.50, 9.74. HRMS (EI) *m/z*: 371.9795 (M<sup>+</sup>); calc. for C<sub>18</sub>H<sub>10</sub>BrFO<sub>3</sub>: 371.9797.

**2-(4-ethoxyphenyl)-9-methyl-4H-furo[2,3-h]chromen-4-one (14u)**

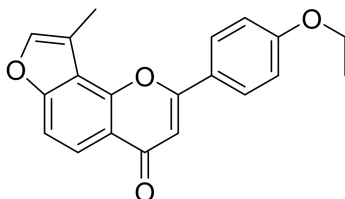

White solid. Yield: 85%. m.p. 217.5-219.0 °C.

<sup>1</sup>H NMR (400 MHz, Chloroform-*d*) δ 8.10 (d, *J* = 8.7 Hz, 1H), 7.92 – 7.72 (m, 2H), 7.48 (d, *J* = 1.6 Hz, 1H), 7.44 (d, *J* = 8.7 Hz, 1H), 7.13 – 6.91 (m, 2H), 6.77 (s, 1H), 4.11 (q, *J* = 7.0 Hz, 2H), 2.60 (d, *J* = 1.4 Hz, 3H), 1.47 (t, *J* = 6.9 Hz, 3H). <sup>13</sup>C NMR (101 MHz, Chloroform-*d*) δ 178.10, 162.69, 161.67, 158.80, 151.84, 142.21, 127.63, 123.82, 121.57, 119.17, 117.70, 115.69, 115.00, 110.03, 106.39, 63.79, 14.73, 10.29. HRMS (EI) *m/z*: 320.1048 (M<sup>+</sup>); calc. for C<sub>20</sub>H<sub>16</sub>O<sub>4</sub>: 320.1049.

**2-(2,4-dichlorophenyl)-9-methyl-4H-furo[2,3-h]chromen-4-one (14v)**

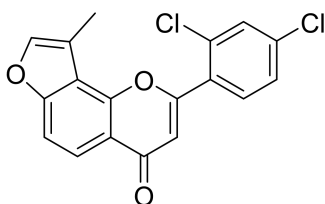

Light green solid. Yield: 87%. m.p. 220.8-222.0 °C. <sup>1</sup>H NMR (400 MHz, Chloroform-*d*) δ 8.14 (d, *J* = 8.8 Hz, 1H), 7.62 (d, *J* = 8.3 Hz, 1H), 7.59 (d, *J* = 2.0 Hz, 1H), 7.51 (d, *J* = 8.8 Hz, 1H), 7.48 (q, *J* = 1.3 Hz, 1H), 7.44 (dd, *J* = 8.3, 2.1 Hz, 1H), 6.70 (s, 1H), 2.46 (d, *J* = 1.4 Hz, 3H). <sup>13</sup>C NMR (101 MHz, Chloroform-*d*) δ 177.65, 160.81, 158.97, 152.28, 142.35, 137.43, 133.73, 131.42, 130.85, 130.51, 127.71, 121.62, 119.06, 117.80, 116.01, 113.53, 110.54, 9.69. HRMS (EI) *m/z*: 344.0008 (M<sup>+</sup>); calc. for C<sub>18</sub>H<sub>10</sub>Cl<sub>2</sub>O<sub>3</sub>: 344.0007.

**4-(9-methyl-4-oxo-4H-furo[2,3-h]chromen-2-yl)benzotrile (14w)**

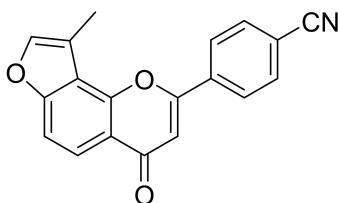

Light green solid. Yield: 80%. m.p. 333.2-334.2 °C. <sup>1</sup>H NMR (400 MHz, Chloroform-*d*) δ 8.15 (d, *J* = 8.8 Hz, 1H), 8.09 – 8.03 (m, 2H), 7.91 – 7.83 (m, 2H), 7.59 – 7.50 (m, 2H), 6.95 (s, 1H), 2.64 (d, *J* = 1.4 Hz, 3H). <sup>13</sup>C NMR (101 MHz, Chloroform-*d*) δ 177.75, 160.22, 159.17, 151.95, 142.65, 136.12, 132.96, 126.51, 121.73, 119.27, 117.92, 117.83, 115.56, 114.89, 110.84, 109.73, 10.30. HRMS (EI) *m/z*: 301.0739 (M<sup>+</sup>); calc. for C<sub>19</sub>H<sub>11</sub>NO<sub>3</sub>: 301.0739.

**2-(4-hydroxyphenyl)-9-methyl-4H-furo[2,3-h]chromen-4-one (14x)**

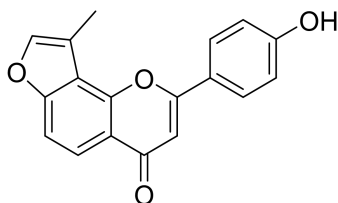

Yellowish solid. Yield: 82%. m.p. 350.1-351.1 °C. <sup>1</sup>H NMR (400 MHz, DMSO-*d*<sub>6</sub>) δ 10.34 (s, 1H), 7.98 – 7.92 (m, 2H), 7.90 (d, *J* = 9.8 Hz, 2H), 7.61 (d, *J* = 8.7 Hz, 1H), 6.96 (d, *J* = 8.3 Hz, 2H), 6.88 (s, 1H), 2.57 (s, 3H). <sup>13</sup>C NMR (101 MHz, DMSO-*d*<sub>6</sub>) δ 176.46, 162.49, 160.79, 157.92, 151.01, 143.34, 128.01, 121.61, 120.77, 118.58, 117.37, 115.99, 115.29, 109.97, 105.14, 9.79. HRMS (EI) *m/z*: 292.0735 (M<sup>+</sup>); calc. for C<sub>18</sub>H<sub>12</sub>O<sub>4</sub>: 292.0736.

**2-(2-hydroxyphenyl)-9-methyl-4H-furo[2,3-h]chromen-4-one (14y)**

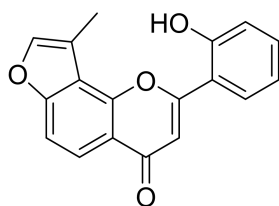

Yellowish brown solid. Yield: 80%. m.p. 236.1-237.1 °C. <sup>1</sup>H NMR (400 MHz, DMSO-*d*<sub>6</sub>) δ 7.98 (d, *J* = 1.6 Hz, 1H), 7.96 – 7.89 (m, 2H), 7.67 (d, *J* = 8.7 Hz, 1H), 7.42 (ddd, *J* = 8.6, 7.3, 1.7 Hz, 1H), 7.17 (s, 1H), 7.12 – 7.03 (m, 3H), 2.56 (d, *J* = 1.4 Hz, 3H).

<sup>13</sup>C NMR (101 MHz, DMSO-*d*<sub>6</sub>) δ 176.81, 160.25, 157.98, 156.47, 151.36, 143.35, 132.47, 128.21, 120.81, 119.54, 118.48, 117.76, 117.43, 117.07, 115.39, 111.33, 110.10, 9.63. HRMS (EI) *m/z*: 292.0739 (M<sup>+</sup>); calc. for C<sub>18</sub>H<sub>12</sub>O<sub>4</sub>: 292.0736.

**2-(5-chloro-2-hydroxyphenyl)-9-methyl-4H-furo[2,3-*h*]chromen-4-one (14z)**

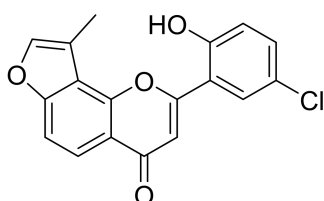

Dark red solid. Yield: 81%. m.p. 388.2-389.2 °C. <sup>1</sup>H NMR (400 MHz, DMSO-*d*<sub>6</sub>) δ 11.12 (s, 1H), 7.96 (d, *J* = 1.6 Hz, 1H), 7.93 – 7.85 (m, 2H), 7.64 (d, *J* = 8.7 Hz, 1H), 7.45 (dd, *J* = 8.8, 2.7 Hz, 1H), 7.18 (s, 1H), 7.09 (d, *J* = 8.8 Hz, 1H), 2.53 (s, 3H). <sup>13</sup>C NMR (101 MHz, DMSO-*d*<sub>6</sub>) δ 176.74, 158.57, 158.01, 155.39, 151.20, 143.43, 131.86, 127.47, 123.04, 120.77, 119.08, 118.81, 118.41, 117.40, 115.26, 111.72, 110.18, 9.44. HRMS (EI) *m/z*: 326.0342 (M<sup>+</sup>); calc. for C<sub>18</sub>H<sub>11</sub>ClO<sub>4</sub>: 326.0346.

**2-(4-hydroxy-3-methoxyphenyl)-9-methyl-4H-furo[2,3-*h*]chromen-4-one (14aa)**

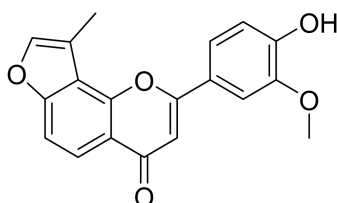

Yellowish brown solid. Yield: 83%. m.p. 320.1-321.1 °C. <sup>1</sup>H NMR (400 MHz, DMSO-*d*<sub>6</sub>) δ 9.96 (s, 1H), 7.96 (d, *J* = 1.6 Hz, 1H), 7.90 (d, *J* = 8.8 Hz, 1H), 7.66 – 7.49 (m, 3H), 7.01 – 6.93 (m, 2H), 3.90 (s, 3H), 2.59 (s, 3H). <sup>13</sup>C NMR (101 MHz, DMSO-*d*<sub>6</sub>) δ 176.54, 162.29, 157.94, 150.97, 150.20, 147.92, 143.39, 121.86, 120.78, 119.78, 118.58, 117.38, 115.83, 115.28, 109.98, 109.60, 105.30, 55.59, 9.70. HRMS (EI) *m/z*: 322.0848 (M<sup>+</sup>); calc. for C<sub>19</sub>H<sub>14</sub>O<sub>5</sub>: 322.0841.

**9-methyl-2-phenyl-4H-furo[2,3-*h*]chromen-4-one (14ab)**

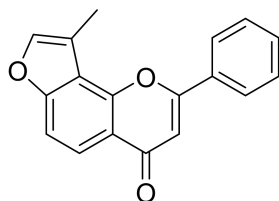

White solid. Yield: 88%. m.p. 185.5-185.7 °C.

$^1\text{H}$  NMR (400 MHz, Chloroform-*d*)  $\delta$  8.12 (d,  $J = 8.7$  Hz, 1H), 7.93 (dd,  $J = 6.6, 3.0$  Hz, 2H), 7.60 – 7.52 (m, 3H), 7.50 (d,  $J = 1.7$  Hz, 1H), 7.47 (d,  $J = 8.7$  Hz, 1H), 6.88 (s, 1H), 2.62 (s, 3H).  $^{13}\text{C}$  NMR (101 MHz, Chloroform-*d*)  $\delta$  178.18, 162.64, 158.92, 151.99, 142.33, 131.87, 131.49, 129.18, 126.02, 121.62, 119.20, 117.79, 115.75, 110.29, 107.96, 10.24. HRMS (EI)  $m/z$ : 276.0787 ( $\text{M}^+$ ); calc. for  $\text{C}_{18}\text{H}_{12}\text{O}_3$ : 276.0786.

#### General procedure for the Synthesis of angular 3-methylfuranoisoquinolinones

A solution of **9** (3 mmol) in methanol (15 mL) was saturated with ammonia and heated to 65 °C for 24 h in a Fisher-Porter bottle. The excess of methanol and ammonia was removed under vacuum at 40 °C to provide pure intermediate **15**. To a solution of **15** (0.42 mmol), and substituted benzaldehyde (1.26 mmol) in dry toluene (20 mL) were added followed by the catalytic amount of piperidine. The resulting mixture was allowed to reflux for 12 h. After removing the solvent under reduced pressure, the residue was purified by column chromatography to afford the product **16** as a white solid. Target compounds **16a-16i** were obtained using this procedure.

#### 4-hydroxy-3-methylbenzofuran-5-carboxamide (**15**)

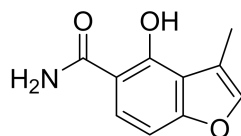

White solid. Yield: 100%. m.p. 191.5-192.5 °C.  $^1\text{H}$  NMR (400 MHz, Chloroform-*d*)  $\delta$  14.32 (s, 1H), 8.40 (s, 1H), 7.87 (s, 1H), 7.75 (d,  $J = 8.8$  Hz, 1H), 7.65 (q,  $J = 1.3$  Hz, 1H), 7.02 (d,  $J = 8.8$  Hz, 1H), 2.33 (d,  $J = 1.4$  Hz, 3H).  $^{13}\text{C}$  NMR (101 MHz, DMSO-*d*<sub>6</sub>)  $\delta$  173.38, 158.90, 158.44, 141.19, 124.09, 117.13, 115.87, 106.98, 102.54, 9.35. HRMS (EI)  $m/z$ : 191.0583 ( $\text{M}^+$ ); calc. for  $\text{C}_{10}\text{H}_9\text{NO}_3$ : 191.0582.

#### 2-(4-methoxyphenyl)-9-methyl-2,3-dihydro-4H-benzofuro[5,4-*e*][1,3]oxazin-4-one (**16a**)

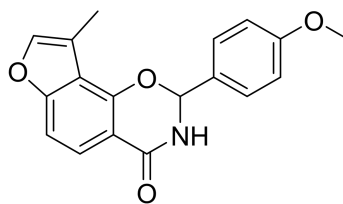

Yellowish solid. Yield: 78%. m.p. > 400 °C.

$^1\text{H}$  NMR (400 MHz, Chloroform-*d*)  $\delta$  7.88 (d,  $J = 8.7$  Hz, 1H), 7.62 – 7.52 (m, 2H), 7.33 (q,  $J = 1.3$  Hz, 1H), 7.19 (d,  $J = 8.6$  Hz, 1H), 7.05 – 6.95 (m, 2H), 6.31 (s, 1H), 6.22 (s, 1H), 3.86 (s, 3H), 2.27 (d,  $J = 1.4$  Hz, 3H).  $^{13}\text{C}$  NMR (101 MHz, Chloroform-*d*)  $\delta$  164.39, 161.02, 159.96, 153.55, 141.65, 128.31, 128.14, 124.28, 117.51, 115.98, 114.35, 111.65, 106.78, 85.66, 55.42, 9.48. HRMS (EI)  $m/z$ : 309.1004 ( $\text{M}^+$ ); calc. for  $\text{C}_{18}\text{H}_{15}\text{NO}_4$ : 309.1001.

#### 2-(2-methoxyphenyl)-9-methyl-2,3-dihydro-4H-benzofuro[5,4-*e*][1,3]oxazin-4-one (**16b**)

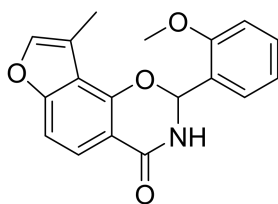

White solid. Yield: 78%. m.p. 171.0-172.7 °C.

$^1\text{H}$  NMR (400 MHz, Chloroform-*d*)  $\delta$  7.89 (d,  $J = 8.6$  Hz, 1H), 7.74 (dd,  $J = 7.6, 1.7$  Hz, 1H), 7.43 (ddd,  $J = 8.3, 7.5, 1.7$  Hz, 1H), 7.35 (q,  $J = 1.3$  Hz, 1H), 7.18 (d,  $J = 8.7$  Hz, 1H), 7.09 (td,  $J = 7.6, 1.0$  Hz, 1H), 6.98 (dd,  $J = 8.3, 1.0$  Hz, 1H), 6.69 (s, 1H), 6.33 (s, 1H), 3.88 (s, 3H), 2.35 (d,  $J = 1.4$  Hz, 3H).  $^{13}\text{C}$  NMR (101 MHz, Chloroform-*d*)  $\delta$  164.53, 159.86, 156.34, 153.59, 141.63, 130.88, 126.85, 124.28, 124.22, 121.01, 117.56, 115.94, 111.71, 110.71, 106.68, 81.11, 55.51, 9.54. HRMS (EI)  $m/z$ : 309.1003 ( $\text{M}^+$ ); calc. for  $\text{C}_{18}\text{H}_{15}\text{NO}_4$ : 309.1001.

**9-methyl-2-(3,4,5-trimethoxyphenyl)-2,3-dihydro-4H-benzofuro[5,4-*e*][1,3]oxazin-4-one (16c)**

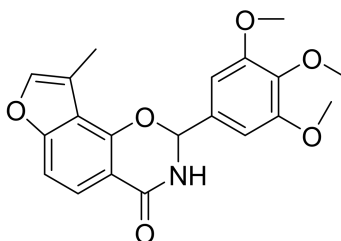

White solid. Yield: 75%. m.p. 205.3-206.1 °C.  $^1\text{H}$  NMR (400 MHz, Chloroform-*d*)  $\delta$  7.89 (d,  $J = 8.7$  Hz, 1H), 7.36 (q,  $J = 1.3$  Hz, 1H), 7.21 (d,  $J = 8.7$  Hz, 1H), 6.86 (s, 2H), 6.30 (s, 2H), 3.91 (d,  $J = 3.4$  Hz, 9H), 2.32 (d,  $J = 1.4$  Hz, 3H).  $^{13}\text{C}$  NMR (101 MHz, Chloroform-*d*)  $\delta$  164.37, 159.97, 153.62, 153.31, 141.80, 139.13, 131.43, 124.22, 117.52, 115.83, 111.69, 106.92, 103.70, 85.71, 60.90, 56.22, 9.54. HRMS (EI)  $m/z$ : 369.1220 ( $\text{M}^+$ ); calc. for  $\text{C}_{20}\text{H}_{19}\text{NO}_6$ : 369.1212.

**2-(4-(dimethylamino)phenyl)-9-methyl-2,3-dihydro-4H-benzofuro[5,4-*e*][1,3]oxazin-4-one (16d)**

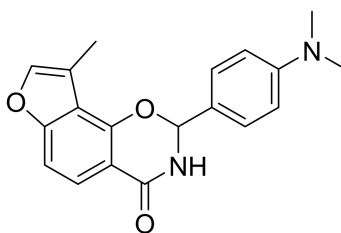

White solid. Yield: 70%. m.p. 184.5-186.7 °C.  $^1\text{H}$  NMR (400 MHz, Chloroform-*d*)  $\delta$  7.89 (d,  $J = 8.6$  Hz, 1H), 7.53 – 7.44 (m, 2H), 7.32 (d,  $J = 1.5$  Hz, 1H), 7.18 (d,  $J = 8.7$  Hz, 1H), 6.80 (d,  $J = 8.2$  Hz, 2H), 6.26 (d,  $J = 1.1$  Hz, 1H), 5.97 (s, 1H), 3.03 (s, 6H), 2.27 (d,  $J = 1.4$  Hz, 3H).  $^{13}\text{C}$  NMR (101 MHz, DMSO-*d*<sub>6</sub>)  $\delta$  164.05, 159.43, 153.35, 147.88, 141.04, 127.54, 123.80, 117.76, 117.01, 115.59, 111.65, 111.17, 106.12, 85.68, 39.98, 9.00. HRMS (EI)  $m/z$ : 322.1310 ( $\text{M}^+$ ); calc. for  $\text{C}_{19}\text{H}_{18}\text{N}_2\text{O}_3$ : 322.1317.

**2-(4-hydroxyphenyl)-9-methyl-2,3-dihydro-4H-benzofuro[5,4-*e*][1,3]oxazin-4-one (16e)**

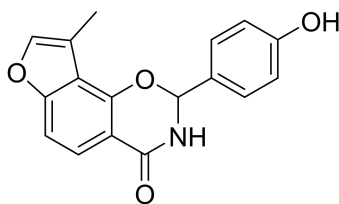

White solid. Yield: 71%. m.p. 260.1-261.1 °C. <sup>1</sup>H NMR (400 MHz, DMSO-*d*<sub>6</sub>) δ 9.72 (s, 1H), 8.80 (d, *J* = 2.1 Hz, 1H), 7.75 (d, *J* = 1.7 Hz, 1H), 7.70 (d, *J* = 8.6 Hz, 1H), 7.47 – 7.37 (m, 2H), 7.26 (d, *J* = 8.6 Hz, 1H), 6.86 – 6.78 (m, 2H), 6.39 (d, *J* = 1.8 Hz, 1H), 2.23 (d, *J* = 1.4 Hz, 3H). <sup>13</sup>C NMR (101 MHz, DMSO-*d*<sub>6</sub>) δ 163.13, 158.71, 158.41, 152.57, 142.49, 128.57, 127.22, 123.64, 116.92, 115.12, 115.07, 112.31, 105.99, 85.13, 9.11. HRMS (EI) *m/z*: 295.0842 (M<sup>+</sup>); calc. for C<sub>17</sub>H<sub>13</sub>NO<sub>4</sub>: 295.0845.

**2-(4-hydroxy-2-methoxyphenyl)-9-methyl-2,3-dihydro-4H-benzofuro[5,4-*e*][1,3]oxazin-4-one (16f)**

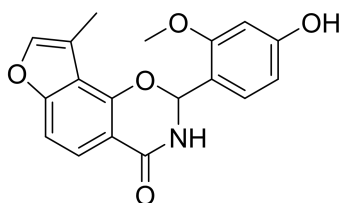

White solid. Yield: 70%. m.p. > 400 °C. <sup>1</sup>H NMR (400 MHz, DMSO-*d*<sub>6</sub>) δ 9.30 (s, 1H), 8.82 (d, *J* = 2.0 Hz, 1H), 7.77 (d, *J* = 1.6 Hz, 1H), 7.70 (d, *J* = 8.6 Hz, 1H), 7.27 (d, *J* = 8.6 Hz, 1H), 7.17 (d, *J* = 2.0 Hz, 1H), 7.01 (dd, *J* = 8.2, 2.0 Hz, 1H), 6.82 (d, *J* = 8.1 Hz, 1H), 6.39 (d, *J* = 1.8 Hz, 1H), 3.79 (s, 3H), 2.26 (d, *J* = 1.5 Hz, 3H). <sup>13</sup>C NMR (101 MHz, DMSO-*d*<sub>6</sub>) δ 163.11, 158.71, 152.55, 147.62, 147.41, 142.55, 127.56, 123.65, 119.97, 116.93, 115.05, 112.35, 110.89, 106.04, 99.49, 85.18, 55.52, 9.14. HRMS (EI) *m/z*: 325.0950 (M<sup>+</sup>); calc. for C<sub>18</sub>H<sub>15</sub>NO<sub>5</sub>: 325.0950.

**9-methyl-2-(4-nitrophenyl)-2,3-dihydro-4H-benzofuro[5,4-*e*][1,3]oxazin-4-one (16g)**

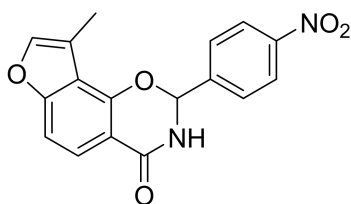

Yellowish solid. Yield: 60%. m.p. 238.9-239.9 °C. <sup>1</sup>H NMR (400 MHz, DMSO-*d*<sub>6</sub>) δ 9.14 (d, *J* = 2.6 Hz, 1H), 8.40 – 8.24 (m, 2H), 7.95 – 7.83 (m, 2H), 7.79 (q, *J* = 1.2 Hz, 1H), 7.70 (d, *J* = 8.6 Hz, 1H), 7.28 (d, *J* = 8.6 Hz, 1H), 6.74 (d, *J* = 2.4 Hz, 1H), 2.30 (d, *J* = 1.4 Hz, 3H). <sup>13</sup>C NMR (101 MHz, DMSO-*d*<sub>6</sub>) δ 162.39, 158.81, 151.82, 148.04, 144.11, 142.80, 128.36, 123.75, 123.63, 117.04, 115.02, 112.29, 106.52, 83.53, 9.15. HRMS (EI) *m/z*: 324.0753 (M<sup>+</sup>); calc. for C<sub>17</sub>H<sub>12</sub>N<sub>2</sub>O<sub>5</sub>: 324.0746.

**4-(9-methyl-4-oxo-3,4-dihydro-2H-benzofuro[5,4-*e*][1,3]oxazin-2-yl)benzotrile (16h)**

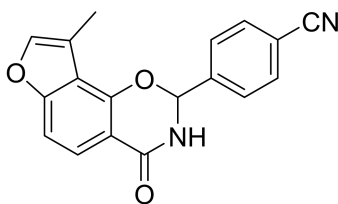

Yellowish solid. Yield: 62%. m.p. 258.2-261.0 °C. <sup>1</sup>H NMR (400 MHz, DMSO-*d*<sub>6</sub>) δ 9.13 – 9.05 (m, 1H), 7.96 (d, *J* = 8.0 Hz, 2H), 7.79 (d, *J* = 7.0 Hz, 3H), 7.69 (d, *J* = 8.6 Hz, 1H), 7.28 (d, *J* = 8.6 Hz, 1H), 6.68 (d, *J* = 2.3 Hz, 1H), 2.29 (s, 3H). <sup>13</sup>C NMR (101 MHz, DMSO-*d*<sub>6</sub>) δ 162.48, 158.79, 151.90, 142.79, 142.23, 132.62, 127.88, 123.63, 118.36, 117.01, 115.01, 112.27, 112.15, 106.49, 83.77, 9.15. HRMS (EI) *m/z*: 304.0845 (M<sup>+</sup>); calc. for C<sub>18</sub>H<sub>12</sub>N<sub>2</sub>O<sub>3</sub>: 304.0848.

#### 2-(furan-2-yl)-9-methyl-2,3-dihydro-4H-benzofuro[5,4-*e*][1,3]oxazin-4-one (16i)

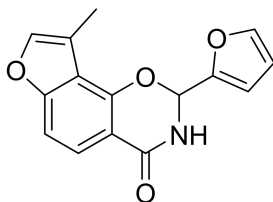

Yellow solid. Yield: 60%. m.p. 175.0-176.0 °C. <sup>1</sup>H NMR (500 MHz, Chloroform-*d*) δ 7.87 (d, *J* = 8.6 Hz, 1H), 7.50 (d, *J* = 1.7 Hz, 1H), 7.33 (d, *J* = 1.6 Hz, 1H), 7.18 (d, *J* = 8.7 Hz, 1H), 6.64 (d, *J* = 3.4 Hz, 1H), 6.54 (s, 1H), 6.48 – 6.41 (m, 2H), 2.33 (d, *J* = 1.3 Hz, 3H). <sup>13</sup>C NMR (101 MHz, Chloroform-*d*) δ 163.76, 159.98, 152.58, 148.87, 143.93, 141.75, 140.75, 124.14, 115.98, 111.63, 110.76, 110.40, 106.99, 79.17, 9.42. HRMS (EI) *m/z*: 269.0687 (M<sup>+</sup>); calc. for C<sub>15</sub>H<sub>11</sub>NO<sub>4</sub>: 269.0688.

#### General procedure for the synthesis of angular 3-methylfuranoisoflavones

A solution of **8** (1 mmol) and *N,N*-dimethylformamide dimethyl acetal (3.5 mmol) in DMF (10 mmol) was heated to 70-75 °C for 4 h. To the cooled reaction mixture was added saturated brine (20 mL), and a green product was precipitated from the solution. The reaction mixture was filtered, and a green precipitation of **17** (99 %) was obtained. A solution of **17** in CHCl<sub>3</sub> (15 mL) was added I<sub>2</sub> (3 mmol, 3 equiv.), and the mixture was stirred at room temperature for 12 h. The reaction was quenched by adding 10 mL 5% aqueous NaHSO<sub>3</sub>, and the aqueous layer was extracted with CHCl<sub>3</sub> (3 × 10 mL). The combined organic layer was washed with 5% aqueous NaHCO<sub>3</sub>, dried over Na<sub>2</sub>SO<sub>4</sub>. Evaporation of the solvent gave a residue, which was purified by column chromatography to afford the product **18** (90 %). A mixture of Na<sub>2</sub>CO<sub>3</sub> (0.212 g, 2 mmol), Pd(OAc)<sub>2</sub> (2 mg, 1 mol %), PEG 10000 (3.5 g), and methanol (3 mL) was heated to 50 °C with stirring. Then **18** (1 mmol) and arylboronic acid (1.5 mmol) was added to the solution, and the mixture was stirred at 50 °C for 4 h. After being cooled to room temperature, the reaction solution was diluted with H<sub>2</sub>O (30 mL) and extracted with diethyl ether (4 × 15 mL). The collected organic extracts were dried (Na<sub>2</sub>SO<sub>4</sub>) and concentrated under reduced pressure. The residue was purified by column chromatography to afford the product **19**. Target compounds **19a-19e** were obtained using this procedure.

#### (*E*)-3-(dimethylamino)-1-(4-hydroxy-3-methylbenzofuran-5-yl)prop-2-en-1-one (17)



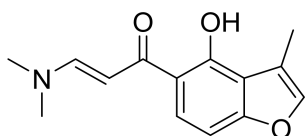

Green solid. Yield: 99%. m.p. 152.7-153.5 °C. <sup>1</sup>H NMR (400 MHz, Chloroform-*d*) δ 15.09 (s, 1H), 7.86 (d, *J* = 12.0 Hz, 1H), 7.58 (d, *J* = 8.8 Hz, 1H), 7.24 (t, *J* = 1.7 Hz, 1H), 6.87 (d, *J* = 9.0 Hz, 1H), 5.75 (d, *J* = 12.0 Hz, 1H), 3.15 (s, 3H), 2.93 (s, 3H), 2.43 (d, *J* = 1.7 Hz, 3H). <sup>13</sup>C NMR (101 MHz, Chloroform-*d*) δ 191.77, 160.91, 159.33, 154.17, 140.12, 124.83, 117.99, 117.18, 113.85, 102.41, 90.22, 45.30, 37.35, 9.73.

### 3-iodo-9-methyl-4*H*-furo[2,3-*h*]chromen-4-one (18)

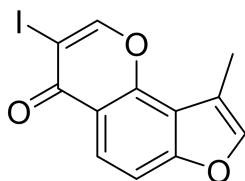

Yellow solid. Yield: 90%. m.p. 207.1-209.1 °C. <sup>1</sup>H NMR (400 MHz, Chloroform-*d*) δ 8.31 (s, 1H), 8.07 (d, *J* = 8.8 Hz, 1H), 7.48 – 7.38 (m, 2H), 2.40 (d, *J* = 1.3 Hz, 3H). <sup>13</sup>C NMR (101 MHz, Chloroform-*d*) δ 171.95, 157.76, 155.76, 151.00, 141.52, 121.49, 116.53, 116.12, 114.99, 110.12, 86.80, 8.61. HRMS (EI) *m/z*: 325.9436 (*M*<sup>+</sup>); calc. for C<sub>12</sub>H<sub>7</sub>IO<sub>3</sub>: 325.9440.

### 9-methyl-3-phenyl-4*H*-furo[2,3-*h*]chromen-4-one (19a)

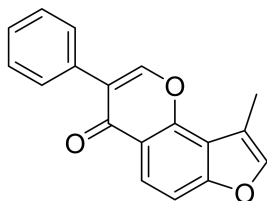

White solid. Yield: 65%. m.p. 159.1-160.3 °C. <sup>1</sup>H NMR (400 MHz, Chloroform-*d*) δ 8.22 (d, *J* = 8.8 Hz, 1H), 8.10 (s, 1H), 7.65 – 7.57 (m, 2H), 7.53 – 7.43 (m, 4H), 7.43 – 7.37 (m, 1H), 2.52 (d, *J* = 1.5 Hz, 3H). <sup>13</sup>C NMR (101 MHz, Chloroform-*d*) δ 175.98, 158.73, 152.16, 152.10, 142.22, 131.90, 129.06, 128.49, 128.21, 125.77, 122.31, 119.86, 117.61, 116.05, 110.40, 9.70. HRMS (EI) *m/z*: 276.0789 (*M*<sup>+</sup>); calc. for C<sub>18</sub>H<sub>12</sub>O<sub>3</sub>: 276.0786.

### 9-methyl-3-(*p*-tolyl)-4*H*-furo[2,3-*h*]chromen-4-one (19b)

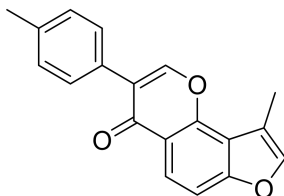

White solid. Yield: 67%. m.p. 120.0-121.2 °C. <sup>1</sup>H NMR (400 MHz, Chloroform-*d*) δ 8.20 (d, *J* = 8.8 Hz, 1H), 8.06 (s, 1H), 7.53 – 7.44 (m, 4H), 7.28 – 7.24 (m, 2H), 2.50 (d, *J* = 1.4 Hz, 3H), 2.40 (s, 3H). <sup>13</sup>C NMR (101 MHz, Chloroform-*d*) δ 176.04, 158.62, 152.03, 151.85, 142.14, 138.02, 129.17, 128.90, 128.87, 125.59, 122.25, 119.79, 117.53, 116.02, 110.24, 21.26, 9.66. HRMS (EI) *m/z*: 290.0938 (*M*<sup>+</sup>); calc. for C<sub>19</sub>H<sub>14</sub>O<sub>3</sub>: 290.0943.

### 3-(4-methoxyphenyl)-9-methyl-4*H*-furo[2,3-*h*]chromen-4-one (19c)

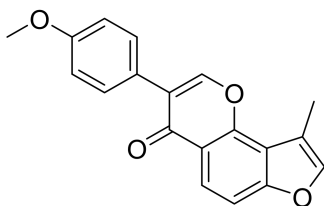

Light green solid. Yield: 70%. m.p. 133.1-134.1 °C. <sup>1</sup>H NMR (400 MHz, Chloroform-*d*) δ 8.21 (d, *J* = 8.8 Hz, 1H), 8.07 (s, 1H), 7.57 – 7.45 (m, 4H), 7.02 – 6.95 (m, 2H), 3.85 (s, 3H), 2.52 (d, *J* = 1.3 Hz, 3H).

<sup>13</sup>C NMR (101 MHz, Chloroform-*d*) δ 176.22, 159.63, 158.67, 152.10, 151.60, 142.15, 130.21, 125.33, 124.17, 122.30, 119.80, 117.57, 116.06, 113.98, 110.29, 55.34, 9.69. HRMS (EI) *m/z*: 306.0896 (M<sup>+</sup>); calc. for C<sub>19</sub>H<sub>14</sub>O<sub>4</sub>: 306.0892.

### 3-(2-bromophenyl)-9-methyl-4*H*-furo[2,3-*h*]chromen-4-one (19d)

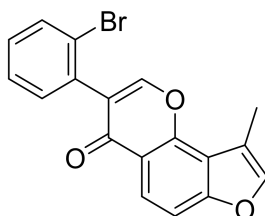

White solid. Yield: 61%. m.p. 159.8-161.6 °C. <sup>1</sup>H NMR (400 MHz, Chloroform-*d*) δ 8.21 (d, *J* = 8.8 Hz, 1H), 8.02 (s, 1H), 7.70 (dd, *J* = 8.0, 1.0 Hz, 1H), 7.57 – 7.45 (m, 2H), 7.43 – 7.32 (m, 2H), 7.31 – 7.26 (m, 1H), 2.53 (d, *J* = 1.3 Hz, 3H). <sup>13</sup>C NMR (101 MHz, Chloroform-*d*) δ 174.74, 158.35, 152.97, 151.80, 141.82, 132.55, 131.79, 129.54, 126.91, 125.77, 124.37, 121.87, 119.30, 117.26, 115.60, 110.02, 9.22. HRMS (EI) *m/z*: 353.9894 (M<sup>+</sup>); calc. for C<sub>18</sub>H<sub>11</sub>BrO<sub>3</sub>: 353.9892.

### 3-(4-bromophenyl)-9-methyl-4*H*-furo[2,3-*h*]chromen-4-one (19e)

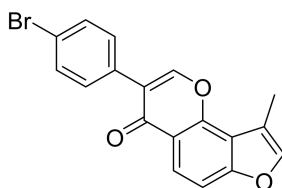

White solid. Yield: 59%. m.p. 184.7-185.8 °C. <sup>1</sup>H NMR (400 MHz, Chloroform-*d*) δ 8.20 (d, *J* = 8.8 Hz, 1H), 8.10 (s, 1H), 7.61 – 7.54 (m, 2H), 7.54 – 7.44 (m, 4H), 2.51 (d, *J* = 1.4 Hz, 3H). <sup>13</sup>C NMR (101 MHz, Chloroform-*d*) δ 175.65, 158.79, 152.07, 152.05, 142.33, 131.66, 130.83, 130.60, 124.74, 122.46, 122.23, 119.72, 117.63, 116.02, 110.56, 9.68. HRMS (EI) *m/z*: 353.9894 (M<sup>+</sup>); calc. for C<sub>18</sub>H<sub>11</sub>BrO<sub>3</sub>: 353.9892.

## Determination of the configuration of 11s, 12c, 14h and 16a.

### X-ray crystal data of 11s:

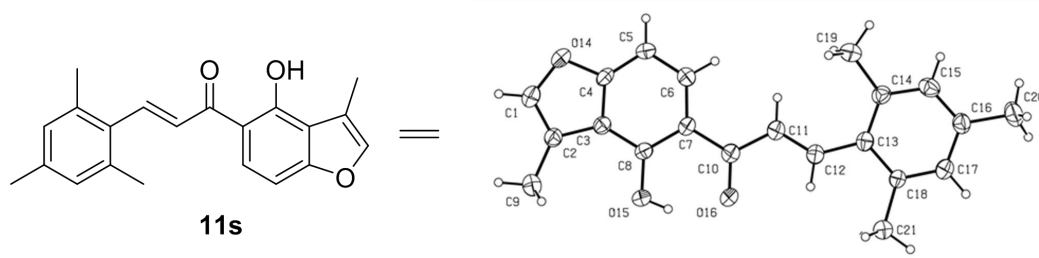

Bond precision: C-C = 0.0064 Å

Wavelength=0.71073

Cell:                a=7.2229(10)        alpha=90  
                      b=14.6972(14)      beta=97.746(11)  
                      c=15.7705(17)      gamma=90

Temperature:        293 K

|                                     | <b>Calculated</b>                              | <b>Reported</b>                                |
|-------------------------------------|------------------------------------------------|------------------------------------------------|
| Volume                              | 1658.9(3)                                      | 1658.9(3)                                      |
| Space group                         | P 21/n                                         | P 1 21/n 1                                     |
| Hall group                          | -P 2yn                                         | -P 2yn                                         |
| Moiety formula                      | C <sub>21</sub> H <sub>20</sub> O <sub>3</sub> | C <sub>21</sub> H <sub>20</sub> O <sub>3</sub> |
| Sum formula                         | C <sub>21</sub> H <sub>20</sub> O <sub>3</sub> | C <sub>21</sub> H <sub>20</sub> O <sub>3</sub> |
| Mr                                  | 320.37                                         | 320.37                                         |
| D <sub>x</sub> , g cm <sup>-3</sup> | 1.283                                          | 1.283                                          |
| Z                                   | 4                                              | 4                                              |
| Mu (mm <sup>-1</sup> )              | 0.085                                          | 0.085                                          |
| F <sub>000</sub>                    | 680.0                                          | 680.0                                          |
| F <sub>000</sub> '                  | 680.33                                         |                                                |
| h,k,lmax                            | 8,17,18                                        | 8,17,18                                        |
| Nref                                | 3034                                           | 3016                                           |
| Tmin,Tmax                           | 0.987,0.992                                    | 0.912,1.000                                    |
| Tmin'                               | 0.968                                          |                                                |

Correction method= MULTI-SCAN

Data completeness= 0.994        Theta(max)= 25.350

R(reflections)= 0.1078( 1884)      wR2(reflections)= 0.2872( 3016)

S = 1.169                                Npar= 222

### X-ray crystal data of 12c:

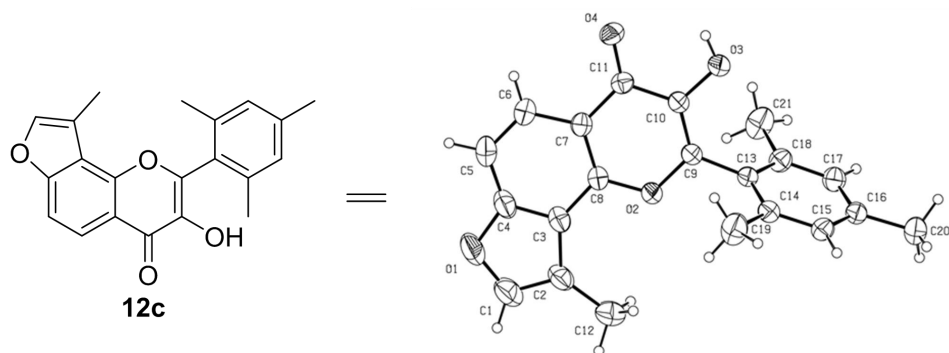

Bond precision: C-C = 0.0033 Å

Wavelength= 0.71073

Cell:                    a=14.1228(16)            alpha= 90  
                              b=9.2810(8)             beta= 114.071(14)  
                              c=14.8338(16)           gamma= 90

Temperature:        293 K

|                        | <b>Calculated</b> | <b>Reported</b> |
|------------------------|-------------------|-----------------|
| Volume                 | 1775.2(4)         | 1775.3(3)       |
| Space group            | P 21/c            | P 1 21/c 1      |
| Hall group             | -P 2ybc           | -P 2ybc         |
| Moiety formula         | C21 H18 O4        | C21 H18 O4      |
| Sum formula            | C21 H18 O4        | C21 H18 O4      |
| Mr                     | 334.35            | 334.35          |
| Dx, g cm <sup>-3</sup> | 1.251             | 1.251           |
| Z                      | 4                 | 4               |
| Mu (mm <sup>-1</sup> ) | 0.086             | 0.086           |
| F000                   | 704.0             | 704.0           |
| F000'                  | 704.37            |                 |
| h,k,lmax               | 17,11,17          | 17,11,17        |
| Nref                   | 3239              | 3236            |
| Tmin,Tmax              | 0.975,0.980       | 0.935,1.000     |
| Tmin'                  | 0.975             |                 |

Correction method= MULTI-SCAN

Data completeness= 0.999            Theta(max)= 25.340  
R(reflections)= 0.0476( 2190)    wR2(reflections)= 0.1400( 3236)  
S = 1.041                                Npar= 231

### X-ray crystal data of 14h:

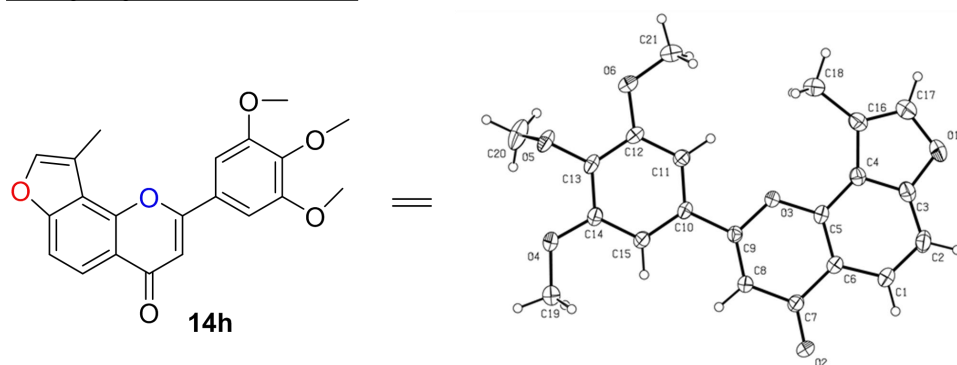

Bond precision: C-C = 0.0031 Å

Wavelength=0.71073

Cell: a=7.8443(9) alpha=99.373(8)  
b=8.5920(7) beta=104.877(10)  
c=13.6376(15) gamma=99.890(8)

Temperature: 293 K

|                        | <b>Calculated</b> | <b>Reported</b> |
|------------------------|-------------------|-----------------|
| Volume                 | 854.21(16)        | 854.21(15)      |
| Space group            | P -1              | P -1            |
| Hall group             | -P 1              | -P 1            |
| Moiety formula         | C21 H18 O6        | C21 H18 O6      |
| Sum formula            | C21 H18 O6        | C21 H18 O6      |
| Mr                     | 366.35            | 366.35          |
| Dx, g cm <sup>-3</sup> | 1.424             | 1.424           |
| Z                      | 2                 | 2               |
| Mu (mm <sup>-1</sup> ) | 0.105             | 0.105           |
| F000                   | 384.0             | 384.0           |
| F000'                  | 384.22            |                 |
| h,k,lmax               | 9,10,16           | 9,10,16         |
| Nref                   | 3128              | 3121            |
| Tmin,Tmax              | 0.963,0.979       | 0.927,1.000     |
| Tmin'                  | 0.950             |                 |

Correction method= # Reported T Limits: Tmin=0.927 Tmax=1.000

AbsCorr = MULTI-SCAN

Data completeness= 0.998 Theta(max)= 25.340

R(reflections)= 0.0467( 2048) wR2(reflections)= 0.1254( 3121)

S = 1.023

Npar= 248

## X-ray crystal data of 16a:

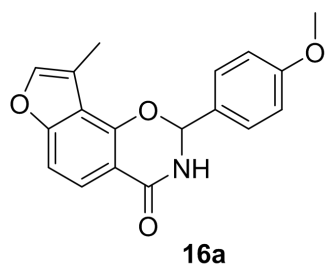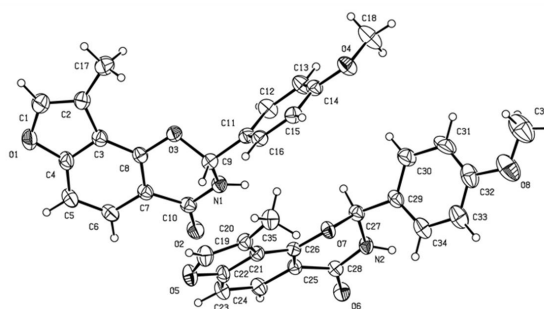

Bond precision: C-C = 0.0044 Å

Wavelength=0.71073

Cell:        a=14.2605(10)        alpha=90  
              b=12.4175(9)        beta=110.920(9)  
              c=18.3015(14)        gamma=90

Temperature: 293 K

|                                     | <b>Calculated</b>                                | <b>Reported</b>                                  |
|-------------------------------------|--------------------------------------------------|--------------------------------------------------|
| Volume                              | 3027.2(4)                                        | 3027.2(4)                                        |
| Space group                         | P 21/n                                           | P 1 21/n 1                                       |
| Hall group                          | -P 2yn                                           | -P 2yn                                           |
| Moiety formula                      | C <sub>18</sub> H <sub>15</sub> N O <sub>4</sub> | C <sub>18</sub> H <sub>15</sub> N O <sub>4</sub> |
| Sum formula                         | C <sub>18</sub> H <sub>15</sub> N O <sub>4</sub> | C <sub>18</sub> H <sub>15</sub> N O <sub>4</sub> |
| Mr                                  | 309.31                                           | 309.31                                           |
| D <sub>x</sub> , g cm <sup>-3</sup> | 1.357                                            | 1.357                                            |
| Z                                   | 8                                                | 8                                                |
| Mu (mm <sup>-1</sup> )              | 0.097                                            | 0.097                                            |
| F <sub>000</sub>                    | 1296.0                                           | 1296.0                                           |
| F <sub>000</sub> '                  | 1296.68                                          |                                                  |
| h,k,lmax                            | 17,14,22                                         | 17,14,22                                         |
| Nref                                | 5537                                             | 5519                                             |
| Tmin,Tmax                           | 0.957,0.973                                      | 0.925,1.000                                      |
| Tmin'                               | 0.957                                            |                                                  |

Correction method= # Reported T Limits: Tmin=0.925 Tmax=1.000

AbsCorr = MULTI-SCAN

Data completeness= 0.997        Theta(max)= 25.350

R(reflections)= 0.0584( 3559)        wR2(reflections)= 0.1685( 5519)

S = 1.030        Npar= 419

**Supplementary Table 2.** Relative induction of GUS activity in rice by compounds

| Compound   | Structure                                                                           | Relative induction of GUS activity <sup>a</sup> |
|------------|-------------------------------------------------------------------------------------|-------------------------------------------------|
| <b>1</b>   | 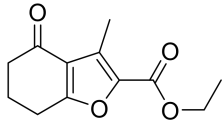   | 1.09                                            |
| <b>2</b>   |    | 0.98                                            |
| <b>3</b>   |    | 1.68**                                          |
| <b>7</b>   |    | 0.77                                            |
| <b>8</b>   |  | 0.96                                            |
| <b>9</b>   |  | 0.62                                            |
| <b>10a</b> |  | 0.79                                            |
| <b>10b</b> |  | 1.00                                            |
| <b>10c</b> |  | 0.90                                            |

|     |                                                                                     |        |
|-----|-------------------------------------------------------------------------------------|--------|
| 10d | 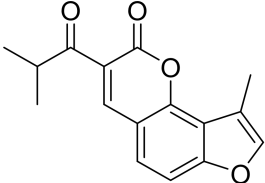   | 1.01   |
| 10e |    | 0.96   |
| 10f |    | 1.24   |
| 10g |   | 0.95   |
| 10h |  | 1.24*  |
| 11a |  | 1.55** |
| 11b |  | 1.39   |
| 11c |  | 0.71   |
| 11d |  | 1.83** |



|            |                                                                                     |        |
|------------|-------------------------------------------------------------------------------------|--------|
| <b>11e</b> | 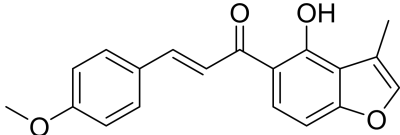   | 1.05   |
| <b>11f</b> |    | 1.61** |
| <b>11g</b> |    | 1.15   |
| <b>11h</b> |    | 1.53** |
| <b>11i</b> |   | 1.15   |
| <b>11j</b> |  | 0.73*  |
| <b>11k</b> |  | 1.51** |
| <b>11l</b> |  | 0.78   |
| <b>11m</b> |  | 1.20   |
| <b>11n</b> |  | 1.54   |

|            |                                                                                     |        |
|------------|-------------------------------------------------------------------------------------|--------|
| <b>11o</b> | 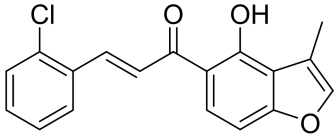   | 1.43*  |
| <b>11p</b> |    | 0.77   |
| <b>11q</b> |    | 1.21   |
| <b>11r</b> |    | 2.11** |
| <b>11s</b> |   | 1.33*  |
| <b>11t</b> |  | 1.18   |
| <b>11u</b> |  | 1.53*  |
| <b>11v</b> |  | 1.48** |
| <b>11w</b> |  | 1.22   |
| <b>11x</b> |  | 1.28*  |

|             |                                                                                     |        |
|-------------|-------------------------------------------------------------------------------------|--------|
| <b>11y</b>  | 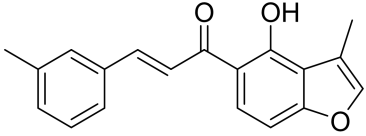   | 1.80** |
| <b>11z</b>  |    | 1.21   |
| <b>11aa</b> |    | 1.40*  |
| <b>11ab</b> |    | 1.26   |
| <b>12a</b>  |   | 1.34** |
| <b>12b</b>  |  | 1.33** |
| <b>12c</b>  |  | 1.16   |
| <b>12d</b>  |  | 0.31** |
| <b>12e</b>  |  | 1.24*  |

|     |                                                                                     |        |
|-----|-------------------------------------------------------------------------------------|--------|
| 12f | 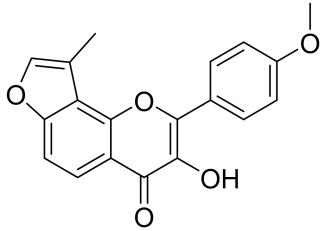   | 1.05   |
| 12g |    | 1.56** |
| 12h |    | 1.18   |
| 12i |  | 1.12   |
| 12j |  | 0.95   |
| 13  |  | 1.10   |
| 14a |  | 0.85   |

|     |                                                                                     |      |
|-----|-------------------------------------------------------------------------------------|------|
| 14b | 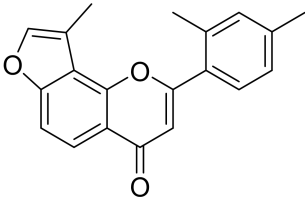   | 1.20 |
| 14c |    | 0.86 |
| 14d |    | 0.79 |
| 14e |   | 1.05 |
| 14f |  | 1.11 |
| 14g |  | 0.94 |
| 14h |  | 1.01 |

|     |                                                                                     |      |
|-----|-------------------------------------------------------------------------------------|------|
| 14i | 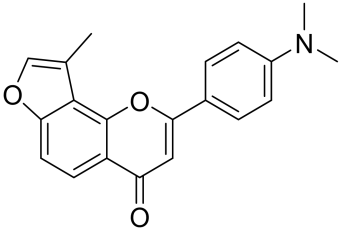   | 1.38 |
| 14j |    | 1.04 |
| 14k |    | 0.99 |
| 14l |   | 1.13 |
| 14m |  | 1.23 |
| 14n |  | 0.97 |
| 14o |  | 1.12 |
| 14p |  | 0.90 |

|     |                                                                                     |        |
|-----|-------------------------------------------------------------------------------------|--------|
| 14q | 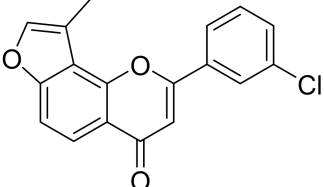   | 1.58*  |
| 14r |    | 1.51*  |
| 14s |    | 1.40** |
| 14t |   | 1.38   |
| 14u |  | 1.61** |
| 14v |  | 0.85   |
| 14w |  | 1.34   |
| 14x |  | 1.21   |

|      |                                                                                     |        |
|------|-------------------------------------------------------------------------------------|--------|
| 14y  | 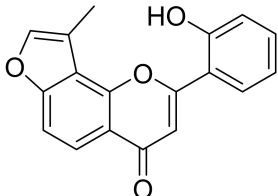   | 1.48   |
| 14z  |    | 1.21   |
| 14aa |    | 1.39   |
| 14ab |   | 1.11   |
| 15   |  | 0.81   |
| 16a  |  | 0.78   |
| 16b  |  | 0.63** |
| 16c  |  | 0.72*  |



|     |                                                                                     |      |
|-----|-------------------------------------------------------------------------------------|------|
| 16d | 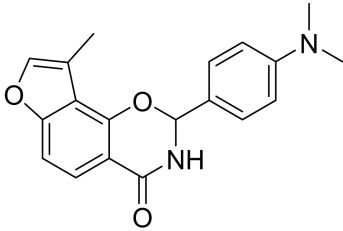   | 0.98 |
| 16e |    | 1.05 |
| 16f |    | 1.13 |
| 16g |   | 1.09 |
| 16h |  | 1.15 |
| 16i |  | 1.05 |
| 17  |  | 1.03 |
| 18  |  | 1.15 |

|                                                                                                                                                                                                                                                                                                   |                                                                                     |      |
|---------------------------------------------------------------------------------------------------------------------------------------------------------------------------------------------------------------------------------------------------------------------------------------------------|-------------------------------------------------------------------------------------|------|
| 19a                                                                                                                                                                                                                                                                                               | 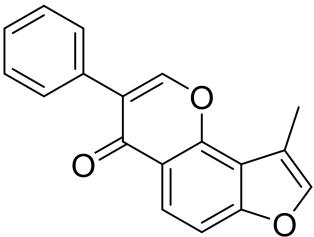   | 0.99 |
| 19b                                                                                                                                                                                                                                                                                               |    | 1.10 |
| 19c                                                                                                                                                                                                                                                                                               |    | 1.05 |
| 19d                                                                                                                                                                                                                                                                                               |   | 1.26 |
| 19e                                                                                                                                                                                                                                                                                               |  | 1.21 |
| <p><sup>a</sup> GUS activity level induced by the tested compound (5 mg L<sup>-1</sup>) divided by the level induced by the control 48 h after treatment. Asterisks indicate significant differences between treatments and controls (*P &lt; 0.05, **P &lt; 0.01, Student's <i>t</i>-tests).</p> |                                                                                     |      |

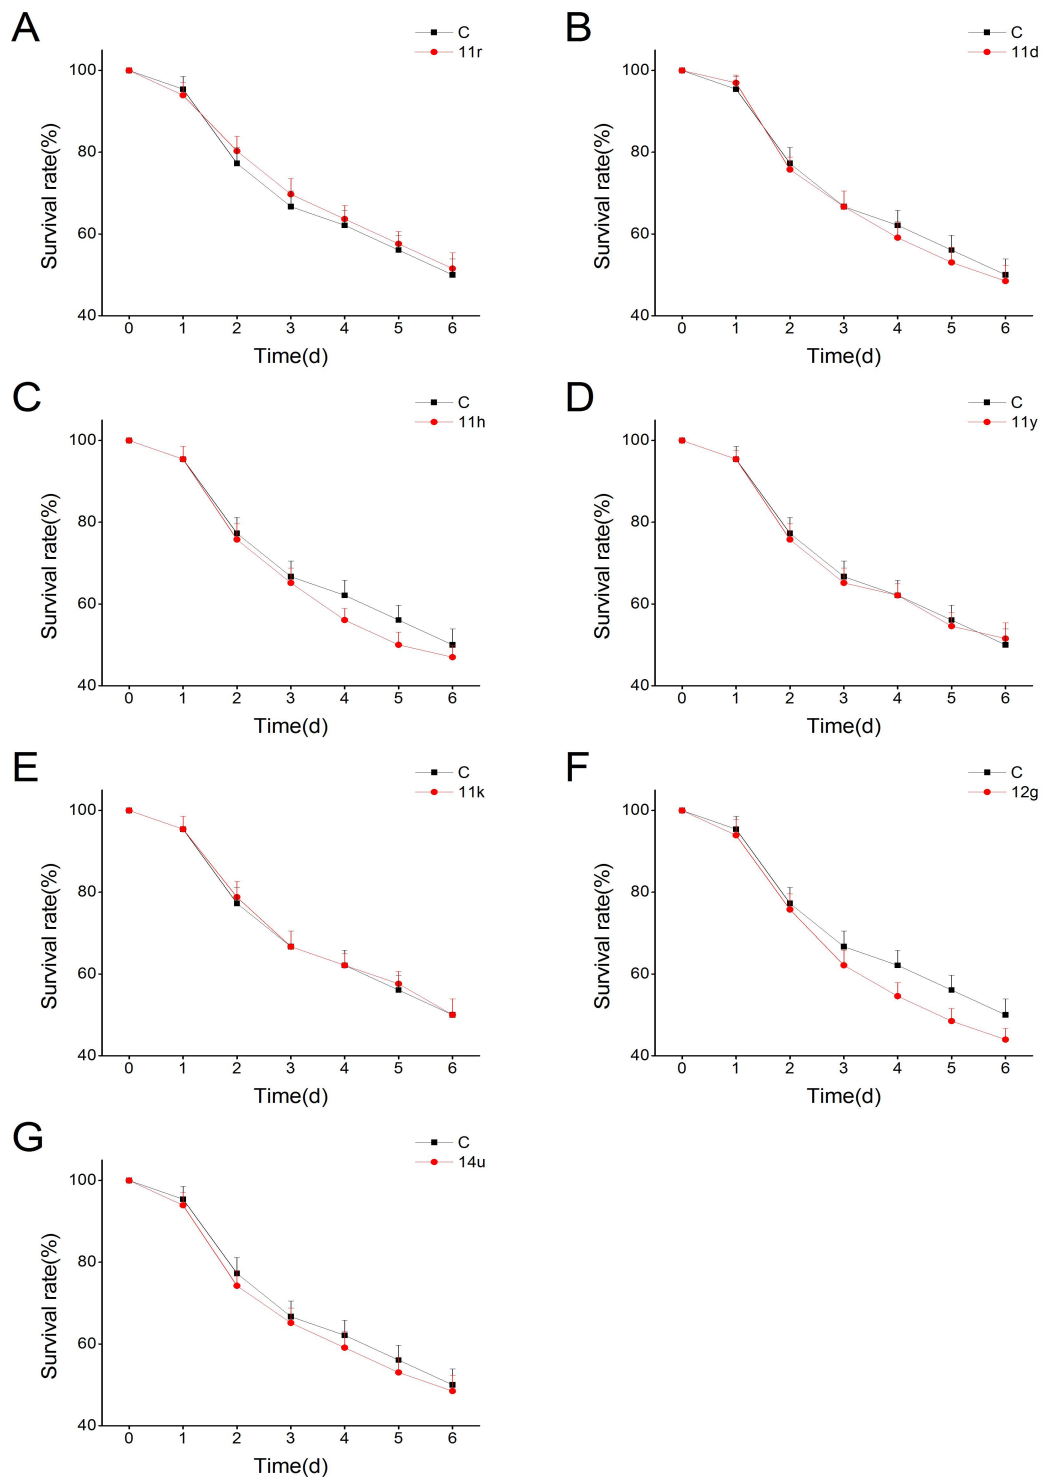

**Supplementary Figure 1.** Mean survival rate of *Nilaparvata lugens* nymphs (+SE, n = 6) fed on artificial diet that contained one of the compounds at a concentration of 20 mg-L<sup>-1</sup> versus control groups fed on artificial diet only (C), 1-6 days after exposure. Asterisks indicate significant differences between compound treatments and controls at each time point (\*P < 0.05, \*\*P < 0.01, Student's t-tests).

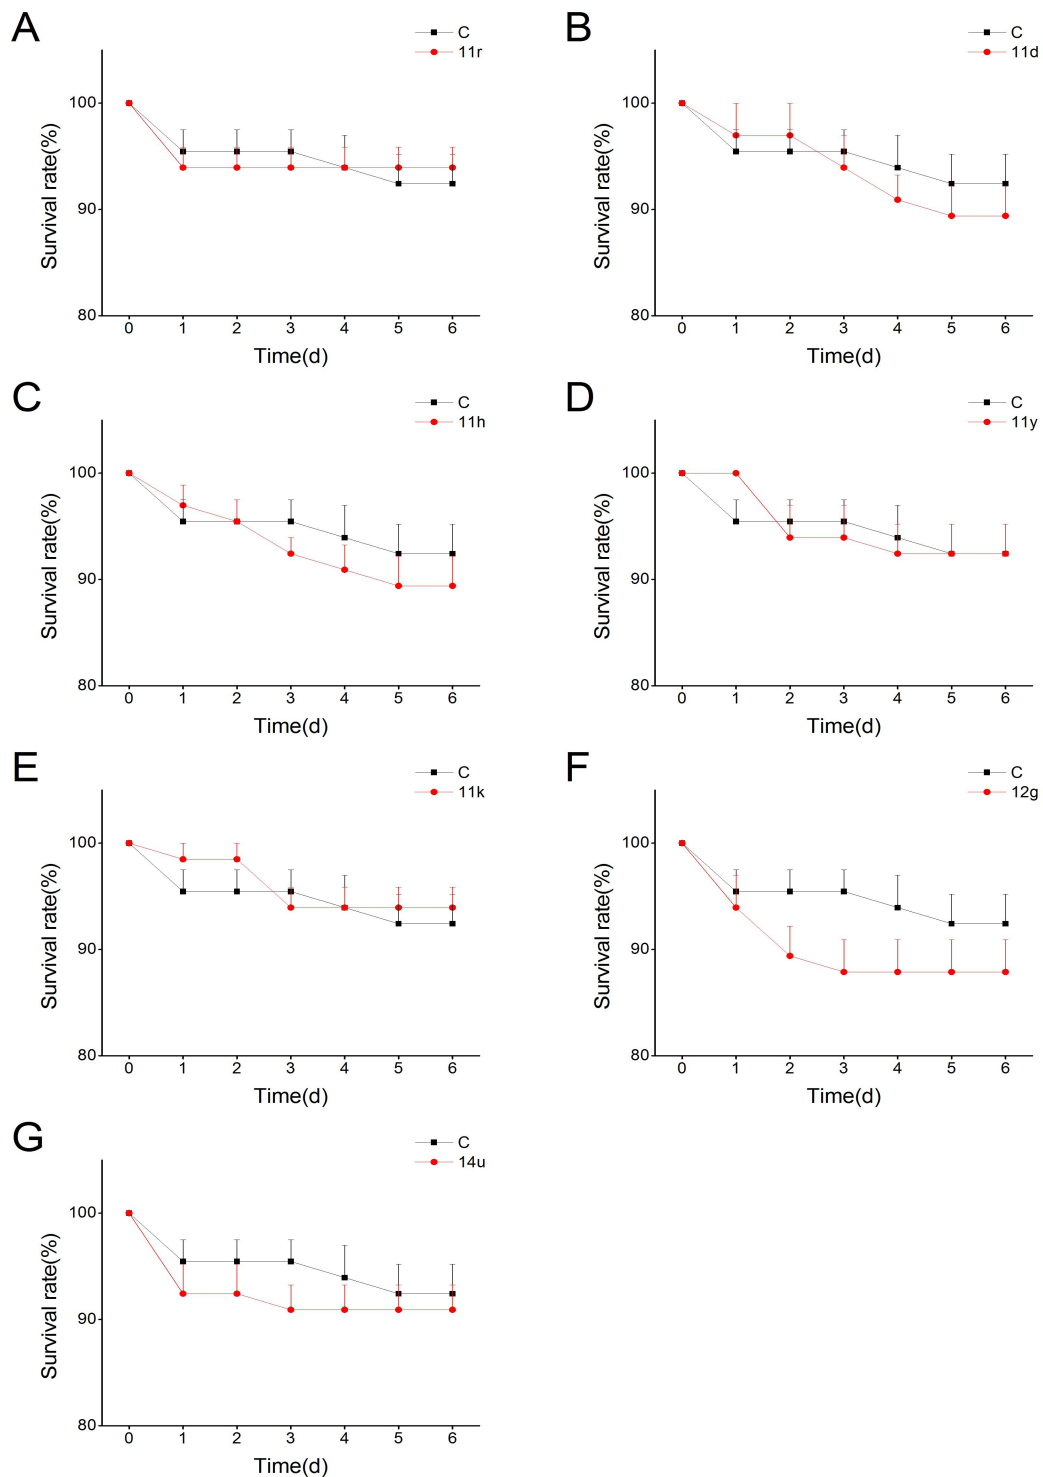

**Supplementary Figure 2.** Mean survival rates of *Nilaparvata lugens* nymphs (+SE, n = 6) that had been sprayed with one of the compounds at a concentration of 20 mg·L<sup>-1</sup> before being placed onto the plants versus mean survival rates of control groups, *Nilaparvata lugens* nymphs (+SE, n = 6) that had been sprayed with water only (C), 1-6 days after exposure. Asterisks indicate significant differences between treatments and controls at each time point (\*P < 0.05, \*\*P < 0.01, Student's t-tests).

**Supplementary Table 3.** Physicochemical properties used in PCA

| Parameter  | Description                                                   |
|------------|---------------------------------------------------------------|
| ncarb      | Count of C atoms                                              |
| noxy       | Count of O atoms                                              |
| nta        | Number of all atoms                                           |
| naccr      | Number of H-bond acceptors                                    |
| ndonr      | Number of H-bond donors                                       |
| nrot       | Number of rotatable bonds                                     |
| MR         | molar refractivity                                            |
| phi        | Kier molecular flexibility index                              |
| logP       | LogP value based on the Crippen method                        |
| Rnc        | Relative negative charge                                      |
| Rpc        | Relative positive charge                                      |
| Tac        | total of absolute charges                                     |
| MSA        | Molecular surface areas                                       |
| ASA        | Solvent-accessible surface areas                              |
| TPSA       | Topological polarity surface area                             |
| RASA       | Relative hydrophobic surface area                             |
| RNCS       | Relative negative charge surface area                         |
| RPCS       | Relative positive charge surface area                         |
| Tv         | T total size index / weighted by atomic van der Waals volumes |
| ExactMolWt | The molecule's exact molecular weight.                        |

**Supplementary Table 4.** Standard deviation and contribution of each principal component to variance

|                        | PC1    | PC2    | PC3    | PC4    |
|------------------------|--------|--------|--------|--------|
| Standard deviation     | 3.069  | 2.174  | 1.409  | 1.079  |
| Proportion of Variance | 47.090 | 23.636 | 9.930  | 5.823  |
| Cumulative Proportion  | 47.090 | 70.725 | 80.655 | 86.478 |

**Supplementary Table 5.** Component loadings for PCA of library with established reference sets.

| Parameter  | PC1      | PC2      | PC3      | PC4      |
|------------|----------|----------|----------|----------|
| ncarb      | 0.278694 | 0.204098 | 0.034114 | -0.09093 |
| noxy       | 0.102058 | -0.26252 | 0.41624  | -0.16286 |
| nta        | 0.308028 | 0.051155 | -0.13287 | 0.063423 |
| naccr      | 0.180855 | -0.29115 | 0.150677 | -0.17505 |
| ndonr      | 0.118171 | -0.31097 | -0.07951 | 0.333389 |
| nrot       | 0.249186 | -0.06009 | -0.23868 | 0.419103 |
| MR         | 0.268119 | 0.139421 | -0.01984 | -0.23901 |
| phi        | 0.273069 | -0.02007 | -0.23564 | 0.349455 |
| logP       | 0.105534 | 0.364543 | 0.145314 | -0.13737 |
| Rnc        | -0.25322 | 0.202375 | -0.06671 | 0.18875  |
| Rpc        | -0.20499 | -0.00379 | 0.002526 | 0.395879 |
| Tac        | 0.257715 | -0.23353 | 0.156331 | -0.10675 |
| MSA        | 0.315255 | 0.062188 | -0.11946 | 0.040557 |
| ASA        | 0.311852 | 0.10732  | -0.0627  | 0.013854 |
| TPSA       | 0.145033 | -0.37596 | 0.134846 | 0.033038 |
| RASA       | 0.015512 | 0.38268  | -0.2084  | -0.17809 |
| RNCS       | 0.058956 | 0.223944 | 0.544719 | 0.26623  |
| RPCS       | 0.072118 | 0.250695 | 0.479067 | 0.341396 |
| Tv         | 0.244553 | 0.18365  | 0.081461 | 0.092353 |
| ExactMolWt | 0.302859 | 0.059881 | -0.05768 | -0.10622 |

**Supplementary Table 6.** SMILES codes of 40 top-selling brand name drugs.

|    |                   |                                                                                                                     |
|----|-------------------|---------------------------------------------------------------------------------------------------------------------|
| 1  | <b>Lipitor</b>    | <chem>CC(C)C1=C(C(=C(N1CC[C@H](C[C@H](CC(=O)O)O)O)C2=CC=C(C=C2)F)C3=CC=CC=C3)C(=O)NC4=CC=CC=C4</chem>               |
| 2  | <b>Nexium</b>     | <chem>CC1=CN=C(C(=C1OC)C)CS(=O)C2=NC3=C(N2)C=C(C=C3)OC</chem>                                                       |
| 3  | <b>Prevacid</b>   | <chem>CC1=C(C=CN=C1CS(=O)C2=NC3=CC=CC=C3N2)OCC(F)(F)F</chem>                                                        |
| 4  | <b>Flonase</b>    | <chem>CCC(=O)O[C@@]1([C@@H](C[C@@H]2[C@@]1(C[C@@H]([C@]3([C@H]2C[C@@H](C4=CC(=O)C=C[C@@]43C)F)F)O)C)C(=O)SCF</chem> |
| 5  | <b>Serevent</b>   | <chem>C1=CC=C(C=C1)CCCCOCCCCCNCC(C2=CC(=C(C=C2)O)CO)O</chem>                                                        |
| 6  | <b>Singulair</b>  | <chem>CC(C)(C1=CC=CC=C1CC[C@H](C2=CC=CC(=C2)C=C\C3=NC4=C(C=CC(=C4)Cl)C=C3)SCC5(CC5)CC(=O)O)O</chem>                 |
| 7  | <b>Effexor</b>    | <chem>CN(C)CC(C1=CC=C(C=C1)OC)C2(CCCCC2)O</chem>                                                                    |
| 8  | <b>Plavix</b>     | <chem>COC(=O)[C@H](C1=CC=CC=C1Cl)N2CCC3=C(C2)C=CS3</chem>                                                           |
| 9  | <b>Zocor</b>      | <chem>CCC(C)(C)C(=O)O[C@H]1C[C@H](C=C2[C@H]1[C@H]([C@H](C=C2)C)CC[C@@H]3C[C@H](CC(=O)O3)O)C</chem>                  |
| 10 | <b>Norvasc</b>    | <chem>CCOC(=O)C1=C(NC(=C(C1C2=CC=CC=C2Cl)C(=O)OC)C)COCCN</chem>                                                     |
| 11 | <b>Lexapro</b>    | <chem>CN(C)CCC[C@@]1(C2=C(CO1)C=C(C=C2)C#N)C3=CC=C(C=C3)F</chem>                                                    |
| 12 | <b>Seroquel</b>   | <chem>C1CN(CCN1CCOCCO)C2=NC3=CC=CC=C3SC4=CC=CC=C42</chem>                                                           |
| 13 | <b>Protonix</b>   | <chem>COC1=C(C(=NC=C1)CS(=O)C2=NC3=C(N2)C=C(C=C3)OC(F)F)OC</chem>                                                   |
| 14 | <b>Ambien</b>     | <chem>CC1=CC=C(C=C1)C2=C(N3C=C(C=CC3=N2)C)CC(=O)N(C)C</chem>                                                        |
| 15 | <b>Actos</b>      | <chem>CCC1=CN=C(C=C1)CCOC2=CC=C(C=C2)CC3C(=O)NC(=O)S3</chem>                                                        |
| 16 | <b>Zoloft</b>     | <chem>CN[C@H]1CC[C@H](C2=CC=CC=C12)C3=CC(=C(C=C3)Cl)Cl</chem>                                                       |
| 17 | <b>Wellbutrin</b> | <chem>CC(C(=O)C1=CC(=CC=C1)Cl)NC(C)(C)C</chem>                                                                      |
| 18 | <b>Avandia</b>    | <chem>CN(CCOC1=CC=C(C=C1)C[C@H]2C(=O)NC(=O)S2)C3=CC=CC=N3</chem>                                                    |
| 19 | <b>Risperdal</b>  | <chem>CC1=C(C(=O)N2CCCC2=N1)CCN3CCC(CC3)C4=NOC5=C4C=CC(=C5)F</chem>                                                 |
| 20 | <b>Zyprexa</b>    | <chem>CC1=CC2=C(NC3=CC=CC=C3N=C2S1)N4CCN(CC4)C</chem>                                                               |
| 21 | <b>Topamax</b>    | <chem>CC1(O[C@@H]2CO[C@@]3([C@H]([C@@H]2O1)OC(O3)(C)C)COS(=O)(=O)N)C</chem>                                         |
| 22 | <b>Toprol</b>     | <chem>CC(C)NCC(COC1=CC=C(C=C1)CCOC)O</chem>                                                                         |
| 23 | <b>Zetia</b>      | <chem>C1=CC(=CC=C1[C@@H]2[C@H](C(=O)N2C3=CC=C(C=C3)F)CC[C@@H](C4=CC=C(C=C4)F)O)O</chem>                             |
| 24 | <b>Fosamax</b>    | <chem>C(CC(O)(P(=O)(O)O)P(=O)(O)O)CN</chem>                                                                         |
| 25 | <b>Abilify</b>    | <chem>C1CC(=O)NC2=C1C=CC(=C2)OCCCCN3CCN(CC3)C4=C(C(=CC=C4)Cl)Cl</chem>                                              |
| 26 | <b>Levaquin</b>   | <chem>C[C@H]1COC2=C3N1C=C(C(=O)C3=CC(=C2N4CCN(CC4)C)F)C(=O)O</chem>                                                 |
| 27 | <b>Lamictal</b>   | <chem>C1=CC(=C(C=C1)Cl)Cl)C2=C(N=C(N=N2)N)N</chem>                                                                  |
| 28 | <b>Celebrex</b>   | <chem>CC1=CC=C(C=C1)C2=CC(=NN2C3=CC=C(C=C3)S(=O)(=O)N)C(F)(F)F</chem>                                               |
| 29 | <b>Benazepril</b> | <chem>CCOC(=O)[C@H](CCC1=CC=CC=C1)N[C@H]2CCC3=CC=CC=C3N(C2=O)CC(=O)O</chem>                                         |
| 30 | <b>Zyrtec</b>     | <chem>C1CN(CCN1CCOCC(=O)O)C(C2=CC=CC=C2)C3=CC=C(C=C3)Cl</chem>                                                      |
| 31 | <b>Coreg</b>      | <chem>COC1=CC=CC=C1OCCNCC(COC2=CC=CC3=C2C4=CC=CC=C4N3)O</chem>                                                      |
| 32 | <b>Valtrex</b>    | <chem>CC(C)[C@@H](C(=O)OCCOCN1C=NC2=C1NC(=NC2=O)N)N</chem>                                                          |
| 33 | <b>Adderall</b>   | <chem>CC(CC1=CC=CC=C1)N</chem>                                                                                      |
| 34 | <b>Aciphex</b>    | <chem>CC1=C(C=CN=C1CS(=O)C2=NC3=CC=CC=C3N2)OCCCO</chem>                                                             |
| 35 | <b>Cymbalta</b>   | <chem>CNCC[C@@H](C1=CC=CS1)OC2=CC=CC3=CC=CC=C32</chem>                                                              |

|    |                 |                                                                                             |
|----|-----------------|---------------------------------------------------------------------------------------------|
| 36 | <b>Crestor</b>  | <chem>CC(C)C1=NC(=NC(=C1\C=C\[C@@H](C[C@H](CC(=O)O)O)O)C2=CC=C(C=C2)F)N(C)S(=O)(=O)C</chem> |
| 37 | <b>Diovan</b>   | <chem>CCCCC(=O)N(CC1=CC=C(C=C1)C2=CC=CC=C2C3=NNN=N3)[C@@H](C(C)C)C(=O)O</chem>              |
| 38 | <b>Tricor</b>   | <chem>CC(C)OC(=O)C(C)(C)OC1=CC=C(C=C1)C(=O)C2=CC=C(C=C2)C1</chem>                           |
| 39 | <b>Concerta</b> | <chem>COC(=O)C(C1CCCCN1)C2=CC=CC=C2</chem>                                                  |
| 40 | <b>Imitrex</b>  | <chem>CNS(=O)(=O)CC1=CC2=C(C=C1)NC=C2CCN(C)C</chem>                                         |

**Supplementary Table 7.** SMILES codes of 20 coumarin and flavonoid natural products.

|    |                              |                                                                 |
|----|------------------------------|-----------------------------------------------------------------|
| 1  | <b>allopsoralen</b>          | <chem>O=C1OC2=CC=C3C(OC=C3)=C2C=C1</chem>                       |
| 2  | <b>angelicin</b>             | <chem>O=C1OC2=C3C(OC=C3)=CC=C2C=C1</chem>                       |
| 3  | <b>xanthotoxol</b>           | <chem>O=C1OC2=C(O)C3=C(C=CO3)C=C2C=C1</chem>                    |
| 4  | <b>Psoralen hydroquinone</b> | <chem>OC1=C2C(C=CO2)=C(O)C3=C1OC(C=C3)=O</chem>                 |
| 5  | <b>sphondin</b>              | <chem>COC1=CC2=C(OC(C=C2)=O)C3=C1OC=C3</chem>                   |
| 6  | <b>2'-acetylangelicin</b>    | <chem>O=C(O1)C=CC2=C1C(C=C(C(C)=O)O3)=C3C=C2</chem>             |
| 7  | <b>glazarin</b>              | <chem>O=C1C2=CC=C(OC(C)=O)C=C2OC(C)=C1C3=CC=CC=C3</chem>        |
| 8  | <b>Sophoricol</b>            | <chem>O=C1C2=C(O)C=C(O)C=C2OC=C1C3=CC=C(O)C=C3</chem>           |
| 9  | <b>xenognosin B</b>          | <chem>OC1=CC=C(C(C(C2=C(O)C=C(OC)C=C2)=CO3)=O)C3=C1</chem>      |
| 10 | <b>4'-hydroxyflavone</b>     | <chem>O=C1C2=CC=CC=C2OC(C3=CC=C(O)C=C3)=C1</chem>               |
| 11 | <b>falvone</b>               | <chem>O=C1C2=CC=CC=C2OC(C3=CC=CC=C3)=C1</chem>                  |
| 12 | <b>chrysin</b>               | <chem>OC1=C2C(OC(C3=CC=CC=C3)=CC2=O)=CC(O)=C1</chem>            |
| 13 | <b>kanjone</b>               | <chem>O=C1C2=CC(OC)=C3C(C=CO3)=C2OC(C4=CC=CC=C4)=C1</chem>      |
| 14 | <b>acacetin</b>              | <chem>O=C1C=C(C2=CC=C(OC)C=C2)OC3=CC(O)=CC(O)=C31</chem>        |
| 15 | <b>sophoretin</b>            | <chem>OC1=CC(O)=C(C(C(O)=C(C2=CC=C(O)C(O)=C2)O3)=O)C3=C1</chem> |
| 16 | <b>chalcone</b>              | <chem>O=C(C1=CC=CC=C1)/C=C/C2=CC=CC=C2</chem>                   |
| 17 | <b>alpinetin chalcone</b>    | <chem>OC1=C(C(/C=C/C2=CC=CC=C2)=O)C(OC)=CC(O)=C1</chem>         |
| 18 | <b>isoliquiritigenin</b>     | <chem>OC1=CC=C(C(/C=C/C2=CC=C(O)C=C2)=O)C(O)=C1</chem>          |
| 19 | <b>Lanceeolatin B</b>        | <chem>O=C1C=C(C2=CC=CC=C2)OC3=C4C(OC=C4)=CC=C31</chem>          |
| 20 | <b>karanjin</b>              | <chem>O=C1C(OC)=C(C2=CC=CC=C2)OC3=C4C(OC=C4)=CC=C31</chem>      |
